# Supplementary material for: Home-based exercise therapy in patients awaiting liver transplantation: protocol for an observational feasibility trial
Source: PubMed Central journal article supplement — BMJ Open. 2018 Jan 21;8(1):e019298. doi: 10.1136/bmjopen-2017-019298 (PMC5781094; doi:10.1136/bmjopen-2017-019298), 2018-01-21
Supplement: bmjopen-2017-019298.draft_revisions.pdf [file bmjopen-2017-019298.draft_revisions.pdf]

# BMJ Open

BMJ Open is committed to open peer review. As part of this commitment we make the peer review history of every article we publish publicly available.

When an article is published we post the peer reviewers' comments and the authors' responses online. We also post the versions of the paper that were used during peer review. These are the versions that the peer review comments apply to.

The versions of the paper that follow are the versions that were submitted during the peer review process. They are not the versions of record or the final published versions. They should not be cited or distributed as the published version of this manuscript.

BMJ Open is an open access journal and the full, final, typeset and author-corrected version of record of the manuscript is available on our site with no access controls, subscription charges or pay-per-view fees (<http://bmjopen.bmj.com>).

If you have any questions on BMJ Open's open peer review process please email [editorial.bmjopen@bmj.com](mailto:editorial.bmjopen@bmj.com)

# BMJ Open

## Home-based exercise therapy in patients awaiting liver transplantation: Protocol for an observational feasibility trial

|                                 |                                                                                                                                                                                                                                                                                                                                                                                                                                                                                                                                                                                                                                                                                                                                                                                                                                                                                          |
|---------------------------------|------------------------------------------------------------------------------------------------------------------------------------------------------------------------------------------------------------------------------------------------------------------------------------------------------------------------------------------------------------------------------------------------------------------------------------------------------------------------------------------------------------------------------------------------------------------------------------------------------------------------------------------------------------------------------------------------------------------------------------------------------------------------------------------------------------------------------------------------------------------------------------------|
| Journal:                        | <i>BMJ Open</i>                                                                                                                                                                                                                                                                                                                                                                                                                                                                                                                                                                                                                                                                                                                                                                                                                                                                          |
| Manuscript ID                   | bmjopen-2017-019298                                                                                                                                                                                                                                                                                                                                                                                                                                                                                                                                                                                                                                                                                                                                                                                                                                                                      |
| Article Type:                   | Protocol                                                                                                                                                                                                                                                                                                                                                                                                                                                                                                                                                                                                                                                                                                                                                                                                                                                                                 |
| Date Submitted by the Author:   | 24-Aug-2017                                                                                                                                                                                                                                                                                                                                                                                                                                                                                                                                                                                                                                                                                                                                                                                                                                                                              |
| Complete List of Authors:       | Williams, Felicity; Queen Elizabeth Hospital Birmingham, Physiotherapy<br>Vallance, Alice; Queen Elizabeth Hospital Birmingham, Physiotherapy<br>Faulkner, Thomas; Queen Elizabeth Hospital Birmingham, Anaesthesia<br>Towey, Jennifer; Queen Elizabeth Hospital Birmingham, Dietetics<br>Kyte, Derek; University of Birmingham, Institute of Applied Health Research<br>Durman, Simon; Virgin Active, Solihull, Personal Training<br>Johnson, Jill; Queen Elizabeth Hospital Birmingham, Dietetics<br>Holt, Andrew; Queen Elizabeth Hospital Birmingham, Liver Transplant and Hepatobiliary Pancreatic Unit<br>Perera, T; Queen Elizabeth Hospital Birmingham,<br>Ferguson, James; Queen Elizabeth Hospital Birmingham, Liver Transplant and Hepatobiliary Pancreatic Unit<br>Armstrong, Matthew; University of Birmingham, NIHR Biomedical Research Unit and Centre for Liver Research |
| <b>Primary Subject Heading</b>: | Gastroenterology and hepatology                                                                                                                                                                                                                                                                                                                                                                                                                                                                                                                                                                                                                                                                                                                                                                                                                                                          |
| Secondary Subject Heading:      | Surgery, Sports and exercise medicine, Rehabilitation medicine                                                                                                                                                                                                                                                                                                                                                                                                                                                                                                                                                                                                                                                                                                                                                                                                                           |
| Keywords:                       | Prehabilitation, Functional capacity, End-stage liver disease, Liver transplantation                                                                                                                                                                                                                                                                                                                                                                                                                                                                                                                                                                                                                                                                                                                                                                                                     |
|                                 |                                                                                                                                                                                                                                                                                                                                                                                                                                                                                                                                                                                                                                                                                                                                                                                                                                                                                          |

SCHOLARONE™  
Manuscripts

# Home-based exercise therapy in patients awaiting liver transplantation: Protocol for an observational feasibility trial

## AUTHORS

Williams FR<sup>1\*</sup>, Vallance A<sup>1</sup>, Faulkner T<sup>2</sup>, Towey J<sup>3</sup>, Kyte D<sup>4</sup>, Durman S<sup>5</sup>, Johnson J<sup>3</sup>, Holt A<sup>6</sup>, Perera T<sup>6</sup>, Ferguson J<sup>6</sup> and Armstrong MJ<sup>6</sup>.

<sup>1</sup>Department of Physiotherapy, Queen Elizabeth University Hospital Birmingham, Birmingham, UK

<sup>2</sup>Department of Anaesthesia, Queen Elizabeth University Hospital Birmingham, Birmingham, UK

<sup>3</sup>Department of Dietetics, Queen Elizabeth University Hospital Birmingham, Birmingham, UK

<sup>4</sup>Centre for Patient-Reported Outcomes Research, Institute of Applied Health Research, College of Medical and Dental Sciences, University of Birmingham, UK

<sup>5</sup>Virgin Active, Blythe Valley Business Park, Solihull, Birmingham, UK

<sup>6</sup>Liver Transplant and Hepatobiliary pancreatic unit, Queen Elizabeth University Hospital Birmingham, Birmingham, UK

\*Corresponding author

Email: flickwilliams31@gmail.com

Address: Physiotherapy Department, Therapy South Suite, Level 1, Queen Elizabeth Hospital Birmingham, Mindelsohn Way, B15 2GW

**Competing interests:** All authors have no conflict of interests to declare.

### Contributor statement:

FRW - concept, design, recruitment and 1st draft and review/editing of final manuscript.

AV, TF, JF and MJA - concept, design, recruitment and review/editing of final manuscript.

DK, SD, JT, JJ, TP, AH - review/editing of final manuscript.

**ABSTRACT**

**Introduction:** Liver disease is the third commonest cause of premature mortality in the UK. Liver failure accelerates frailty resulting in skeletal muscle atrophy, functional decline and an associated risk of liver transplant waiting list mortality. However, there is limited research investigating the impact of exercise on patient outcomes pre-and post-liver transplantation. The waitlist period for patients listed for liver transplantation provides a unique opportunity to provide and assess interventions such as prehabilitation.

**Method and Analysis:** This study is a phase I observational study evaluating the feasibility of conducting a randomised control trial investigating the use of a home-based exercise program (HBEP) in the management of patients awaiting liver transplantation. Twenty eligible patients will be randomly selected from the Queen Elizabeth Hospital Birmingham Liver Transplant waiting list. Participants will be provided with an individually tailored twelve week HBEP, including step targets and resistance exercises. Activity trackers and patient diaries will be provided to support data collection. For the initial six weeks, telephone support will be given to discuss compliance with the study intervention, achievement of weekly targets, and to address any queries or concerns regarding the intervention. During weeks 6-12, participants will continue the intervention without telephone support to evaluate longer-term adherence to the study intervention. On completing the intervention, all participants will be invited to engage in a focus group to discuss their experiences and the feasibility of a RCT.

**Ethics and Dissemination:** The protocol is approved by the National Research Ethics Service Committee North West - Greater Manchester East and Health Research Authority (REC reference: 17/NW/0120). Recruitment into the study started in April 2017 and ended in July 2017. Follow-up of participants is ongoing and due to finish by the end of 2017. The findings of this study will be disseminated through peer-reviewed publications and international presentations.

**Registration:** [clinicaltrials.gov/NCT02949505](http://clinicaltrials.gov/NCT02949505)

**Keywords:** Prehabilitation, functional capacity, end-stage liver disease, liver transplantation.

**Strengths:**

1. This is the first study to investigate a home based exercise programme in patients with end-stage liver disease and listed for liver transplantation.
2. An extensive clinical evaluation of functional capacity and quality of life in a high risk group of patient in whom there is a pressing need for optimisation prior to transplantation.

**Limitations:**

1. A pilot study of small sample size, but with the aim and design focusing on the feasibility of a randomised control trial of prehabilitation in patients awaiting liver transplantation.

**INTRODUCTION**

Liver disease is the third commonest cause of premature mortality in the UK (1). Currently, a liver transplant is the only cure for end-stage liver disease (2). The existing shortage of donor organs highlights the importance of being able to accurately identify those individuals whom will benefit the most from transplantation.

Frailty is defined as the biologic syndrome of decreased reserve and resistance to stressors, which cause vulnerability to adverse outcomes (3). Liver failure accelerates this process, resulting in skeletal muscle atrophy (sarcopenia), reduced functional capacity and an associated increased risk of liver transplant waiting list mortality (4).

Evidence suggests that a subgroup of patients with end-stage liver disease who have low functional capacity, defined as a  $VO_{2max}$  below  $9\text{mL}\cdot\text{kg}^{-1}$  or  $<60\%$  predicted, often fail to survive to transplantation (5, 6). Furthermore, low functional capacity is associated with a number of poor post-transplantation outcomes including longer post-operative hospital stay and higher 100-day mortality (7). Despite these findings, current management of end-stage liver disease tends to focus on preventing and treating complications (i.e. variceal haemorrhage, ascites), rather than prospective strategies to improve functional capacity.

1  
2  
3 Research in non-end-stage liver disease populations has demonstrated the potential role of  
4 pre-operative exercise programmes, known as 'prehabilitation', in optimising patient's  
5 functional capacity prior to abdominal surgery and reducing post-operative complications  
6 (8, 9). Furthermore, exercise training has been shown to improve functional capacity and  
7 quality of life in a wide variety of chronic diseases (10-12). The time period for patients  
8 whilst active on the liver transplant waiting list provides a unique opportunity to provide  
9 physical interventions, such as prehabilitation. This could potentially have a significant effect  
10 on short, medium and long-term outcomes at a relatively low cost.  
11  
12

13  
14  
15  
16  
17  
18  
19 Recently, studies have demonstrated significant improvement in functional capacity  
20 following delivery of an exercise programme in patients with all causes of liver disease (13-  
21 16). Furthermore, significant improvements in muscle mass (14, 15) and EuroQol Group EQ-  
22 visual analogue of self-perceived health status (15) were shown. Although, all studies  
23 suggest exercise is a safe intervention in this patient population, 3 of the 4 studies excluded  
24 patients with end-stage cirrhosis (14-16). In view of this, as well as small participant  
25 numbers in each study, the safety of this intervention cannot be certain. Moreover, all  
26 studies were undertaken with weekly, directly supervised exercise sessions only. The seven  
27 UK NHS Liver Transplant centres cover a vast geographical area, therefore twice weekly  
28 visits by patients to their nearest transplant centre is unlikely to be feasible. Interventions  
29 which can be conducted local to the patient's homes or indeed in the patient's own homes  
30 need to be evaluated in a RCT.  
31  
32  
33  
34  
35  
36  
37  
38  
39

40  
41  
42 Before a RCT can be conducted, a feasibility study is required to determine if a larger trial is  
43 possible, and if so, outline the optimal design features. Therefore, the aim of this study is to  
44 conduct a single centre feasibility trial of a novel home-based exercise programme in  
45 patients with end-stage liver disease awaiting liver transplantation.  
46  
47  
48  
49  
50  
51  
52  
53  
54  
55  
56  
57  
58  
59  
60

## METHODS AND ANALYSIS

### Study Design Overview

The proposed feasibility trial is a single arm, single centre, study of a home-based exercise programme (HBEP) for patients listed for liver transplantation.

Patients recruited to the study at the Queen Elizabeth University Hospital Birmingham (QEUHB) UK liver transplant unit will be treated with a 12-week HBEP (Figure 1). Functional capacity, health related quality of life, anxiety and depression, anthropometry and adverse events will be assessed at baseline, 6 weeks and 12 weeks after the study intervention is commenced.

On completion of the HBEP intervention participants will be invited to attend a process evaluation focus group. The purpose of the focus group is to identify attitudes, motivators and barriers to the study intervention as well as to reflect upon the usefulness/acceptability of the study materials and equipment. Data will be collected and used to address the research questions outlined in Box 1.

#### Box 1 – Process Evaluation Focus Group Research Questions

1. What motivated the participants to adhere to the study intervention?
2. Did the participants identify any barriers to completing the study intervention?
3. How useful did the participants find the accelerometers?
4. How useful did the participants find the weekly telephone support?

Figure 1

## Ethical and Regulatory Approval

The National Research Ethics Service (NRES) Committee and Health Research Authority North West - Greater Manchester East (REC reference: 17/NW/0120) approved version 1.1 of the study protocol. All participants will provide informed written consent.

## Sample and Selection

Twenty eligible patients will be selected from the QEUHB liver transplantation waiting list using a stratified random sampling method. Subgroups will include four patients from each of the following disease types; alcoholic liver disease, non-alcoholic fatty liver disease, autoimmune liver disease, genetic liver disease and viral hepatitis. This is to ensure that various forms of liver disease will be represented in the study. Patients will be eligible to be included in the study if they meet the following criteria:

### *Inclusion criteria:*

- Meet the UK Liver Transplant criteria for listing (17)
- Accepted on the liver transplant waiting list for a primary transplant
- Adults  $\geq 18$  years

### *Exclusion criteria:*

- Significant cardiovascular instability including a recent MI, recent CVA and/or a recent unstable cardiac arrhythmia
- Unstable encephalopathy - open to interpretation by the chief investigator
- Neither patient or next of kin non-English speaking
- Inpatient at the time of screening
- Refusal or lacks capacity to give informed consent



1  
2  
3 Once deemed eligible, patients will be sent a letter of invitation to be involved in the study  
4 along with a participant information sheet. Patients will be contacted by telephone 5-7 days  
5 after the letters are sent. If participants are willing to take part, an appointment will be  
6 arranged within 6 weeks, when patients will be able to provide informed written consent.  
7  
8  
9

## 10 11 12 13 **Method**

14  
15  
16  
17 Patients on the QEUHB liver transplant waiting list routinely attend outpatient clinics on 6-  
18 weekly basis. All study visits will be incorporated into their routine clinic follow-up. On  
19 attendance to clinic (baseline study visit), participants will complete baseline assessments of  
20 functional capacity, anthropometry and questionnaires to assess quality of life and anxiety  
21 and depression. The study intervention will be completed for 6 weeks with weekly  
22 telephone support, including a telephone questionnaire (see appendix 1). On return to clinic  
23 at week 6 (study visit 2), functional capacity, quality of life and anxiety/depression scores  
24 will be re-assessed. For the remaining 6 weeks of the study participants will continue with  
25 the HBEP, but without telephone support. This is to assess the carryover effect of  
26 information provided and assess the ability of the participants to continue the HBEP  
27 independently whilst on the waiting list. On return to clinic at 12 weeks (study visit 3) all  
28 participants will be re-assessed in terms of functional capacity, quality of life and anxiety  
29 scores. If a participant is unable to participate in exercise due to illness for a week or  
30 number of weeks then intermittent participation will be permitted. Periods of illness and  
31 intermittent participation will be recorded on the case report form (CRF) and accounted for  
32 in the data analysis.  
33  
34  
35  
36  
37  
38  
39  
40  
41  
42  
43  
44  
45  
46

### 47 **Intervention: home based exercise programme (HBEP)**

48  
49  
50 Participants will be provided with a 6 week HBEP including daily step targets and functional  
51 resistance-based exercises (Figure 2). Participants will be provided with an accelerometer  
52 (COOSA Heart Rate Monitor) to aid tracking of their daily steps and activity levels. In  
53 addition, participants will be asked to record their activity in a diary to aid self-reporting at  
54 the weekly telephone contact.  
55  
56  
57  
58  
59  
60

1  
2  
3  
4  
5 *Daily step programme* – During the first week, participants will be asked to monitor their  
6 daily step count via their accelerometer. Following weekly telephone contact, the  
7 participant will be advised to increase their daily step count by 200-500 steps each day  
8 every week depending on the level of function and achievement of step target of the  
9 previous week. For participants who are able, a target of 10000 steps will be set by the end  
10 of the first 6 weeks or to aim for by the end of 12 weeks. This is the recommended daily step  
11 target set by the government in order to achieve the minimum 150 minutes of moderate  
12 exercise per week and to help facilitate change in health status (Department of Health,  
13 2011).  
14  
15  
16  
17  
18  
19  
20

21  
22 *Functional resistance exercise sessions* – During the initial assessment patients will be taught  
23 functional resistance exercises to complete at home (Figure 2). Information provided will be  
24 followed up with an exercise worksheet as well as a video to aid patient understanding and  
25 adherence. Sessions will be split into 3 levels of difficulty and participants will be advised to  
26 complete the level most suitable for them depending upon their baseline functional capacity  
27 scores. Participants will be asked to achieve a work rate of 12-13 on the BORG Rate of  
28 Perceived Exertion (RPE) score (6-20 scale) (18). An RPE of 12-13 has been shown to  
29 correlate with anaerobic threshold (19) and will therefore guide the participants to work to  
30 a training level which will elicit change in functional capacity. Participants will be advised to  
31 progress to each level depending on their RPE scores and results of the telephone health call  
32 questionnaire.  
33  
34  
35  
36  
37  
38  
39  
40  
41  
42

43  
44 *Telephone Health Call* - During the first 6 weeks of the study intervention, participants will  
45 receive one 20 minute telephone call weekly from the chief investigator or a nominated  
46 member of the research team. The purpose of the telephone call is to provide support and  
47 guidance with the study intervention and address the following areas:  
48  
49  
50

- 51 • Compliance to the study intervention
- 52 • Achievement of weekly pre-agreed step count and functional resistance exercise
- 53 level
- 54 • Step target for the following week
- 55
- 56
- 57
- 58
- 59
- 60

- Queries or concerns regarding the intervention
- Incidence of any adverse events

After 6 weeks of the HBEP study intervention, participants will continue with the intervention without telephone support. This aims to assess longer-term adherence to the study intervention without weekly telephone support.

#### *Process Evaluation Focus Group*

Within 6 weeks of completing the 12-week study intervention all participants will be invited to attend one of two focus groups. The chief investigator, along with a member of the research team, will conduct two focus groups aiming to: (i) explore the thoughts/experiences of the participants regarding the study process, (ii) explore acceptability of the exercise programme and support provided. All participants will be invited to capture the range of participant experiences.

#### **Figure 2**

### **OUTCOME MEASURES**

#### **Primary Outcome**

The primary outcome of the study is feasibility whereby the decision to proceed to a RCT will be made upon the following criteria:

1. No serious adverse events (defined as grade 3/4) directly related to the HBEP
2. >66% of the active transplant waiting list for primary grafts must meet the eligibility criteria, to achieve timely recruitment and representation of the cohort
3. >90% recruitment to target number of participants (n=20) during the allotted study time period to achieve timely recruitment and assess willingness of patients to participate
4. >66% compliance with the step count (including ranges) whilst active on the transplant waiting list

- 1
- 2
- 3 5. >66% compliance with resistance exercises whilst active on the transplant waiting list
- 4
- 5 6. Of those who undergo initial assessment, >66% complete 6-weeks HBEP
- 6
- 7
- 8

9 Feedback will be documented from those participants who are approached but who refuse  
10 to consent or withdraw from the study, on the understanding that this feedback will be  
11 optional.  
12

### 13 14 15 16 **Candidate Primary Outcomes**

17  
18  
19 The following candidate outcomes will be assessed at baseline (pre-HBEP), after 6 and 12  
20 weeks of the HBEP. Feasibility will be determined according to the acceptability and  
21 usefulness of these outcome measures as well as time and resources needed to collect data.  
22

23  
24  
25  
26 Anthropometry: - At each study visit body mass index (BMI), hand grip strength, mid-arm  
27 circumference and triceps skin fold will be assessed. These assessments are currently  
28 completed as part of standard care by the QEUHB Liver Dietetic team and will be used in the  
29 study to ensure control of variables and inform the researches of any change in nutrition.  
30  
31  
32

33  
34  
35 Incremental shuttle walk test (ISWT): - The ISWT is a standardised, externally paced,  
36 incremental field-walking test which evaluates maximal exercise capacity. The patient is  
37 progressively stressed to a symptom limited maximal performance by walking at different  
38 speeds around a 10m course which is dictated by an audio signal. It is a reliable (20) and  
39 valid measure which has been used in a wide range of chronic diseases (21-23) as well as a  
40 predictor of mortality post-abdominal surgery (24).  
41  
42  
43  
44  
45

46  
47  
48 Short Performance Battery (SPB) test: - It is a physical functional tool which can identify  
49 disability and predict mortality through assessment of gait speed, balance and repeated  
50 chair stands. It is a valid tool used within the liver cirrhosis patient population. A score of  
51 less than 9 has been associated with a 45% increase in waiting list mortality in patients listed  
52 for liver transplantation, independent of the model for end stage liver disease (MELD) score  
53 (4).  
54  
55  
56  
57  
58  
59  
60

1  
2  
3  
4  
5 EQ-5D (version 2.1): - This is a reliable and validated tool used in a wide range of health  
6 conditions and treatments. It provides information on health status which will be used to  
7 help evaluate the clinical and economic value of the study intervention (25).  
8  
9

10  
11  
12 Hospital Anxiety and Depression Score (HADS): - This is a reliable and valid tool for assessing  
13 anxiety and depression in medical patients (26). It will be used to identify if there is a need  
14 to include psychological support in future larger research projects. Participants will be  
15 advised in the participant information sheet that the purpose of the study is not to address  
16 any anxiety or depression concerns and if they feel this is a concern they should contact  
17 their general practitioner.  
18  
19  
20  
21  
22  
23

24 Telephone questionnaire: - This will be completed weekly throughout the first 6 weeks of  
25 the study intervention. The telephone questionnaire provides a standardised framework for  
26 assessing the participant's weekly progress and identifying any areas of concern.  
27  
28 Furthermore, the answers will provide guided goal setting for the following week.  
29  
30  
31  
32  
33  
34

### 35 **DATA ANALYSIS PLAN**

36  
37  
38 All quantitative data will be entered into a purposefully designed secure access database  
39 and exported to SPSS for statistical analysis (Version 24). Feasibility decision rules and  
40 primary candidate outcomes will be analysed and presented using descriptive statistics.  
41  
42  
43  
44  
45

46 Two focus groups will be conducted with three thematic components 1) barriers to the  
47 intervention, 2) facilitators of adherence and 3) level of support received, although, where  
48 appropriate, sufficient scope will be given to explore novel themes. Two members of the  
49 research team will conduct the focus group. Each session will be digitally recorded,  
50 transcribed verbatim and uploaded into NVivo 10 software to aid organisation and analysis  
51 of data. NVivo will be used to store data transcripts, and as a means by which codes could  
52 be highlighted and collated based upon the themes described above as well as to explore  
53  
54  
55  
56  
57  
58  
59  
60

1  
2  
3 any new emerging themes.  
4

## 5 6 **ADVERSE EVENTS AND ANALYSIS** 7

8  
9 An adverse event (AE) would be unlikely in this study due to the extensive investigations the  
10 patients have undergone prior to being listed for liver transplantation. However, the  
11 reporting period for AE will start at initial screening and continued until the end of the  
12 second focus group. Serious adverse events (SAE) will be reported until 30 days post each  
13 participant's liver transplant. All SAEs and adverse reactions will be evaluated and recorded  
14 using the National Cancer Institute's common terminology criteria for AEs (CTCAE, V.4.0,  
15 2010) and reported to the Principle Investigator. All SAEs will be reported to the sponsor's  
16 Research and Development department via the SAE form in the CRF. Only those events  
17 classified as probable or definitely related will be reported to the Research Ethics  
18 Committee.  
19  
20  
21  
22  
23  
24  
25  
26  
27  
28  
29

## 30 31 **STORAGE OF DATA** 32

33  
34 All data for an individual participant will be collected by the Principal Investigator or their  
35 delegated nominees and recorded in the CRF. Participant identification on the CRF will be  
36 through their unique Participant Study Number, which will be allocated at the time of  
37 consideration for the study. Data will be collected from the time the patient is considered  
38 for entry into the study through to 30 days after they receive their liver transplant. All  
39 clinical data will be stored as per NHS regulations and held on the UK National Transplant  
40 Database.  
41  
42  
43  
44  
45  
46  
47

48 Data from the CRF will be entered into a secure password protected database held on the  
49 University Hospitals Birmingham Trust computer. Due care will be taken to ensure data  
50 safety and integrity, and compliance with the Data Protection Act 1998. All essential  
51 documentation and trial records will be stored in conformance with the applicable  
52 regulatory requirements and access to stored information will be restricted to authorized  
53  
54  
55  
56  
57  
58  
59  
60

1  
2  
3 personnel. Coded research data will be stored for 5 years anonymously under the property  
4 of University Hospitals Birmingham in keeping with good clinical practice.  
5  
6  
7

### 8 **CASE REPORT FORM**

9  
10  
11 CRFs will include baseline/follow-up functional capacity, anthropometry and questionnaire  
12 scores to capture changes in outcomes. Other CRFs incorporated in the electronic database  
13 will include: medical history; eligibility screening; date of transplant; donor organ and  
14 operation data, length of ITU stay; 30-day outcome post-transplant; safety monitoring; AE  
15 reporting; study treatment adherence and attendance to focus groups.  
16  
17  
18  
19  
20  
21

### 22 **SPONSORSHIP, INDEMNITY AND MONITORING**

23  
24  
25  
26 QEUHB will act as the sponsor through the duration of the study. As sponsor, QEUHB will be  
27 responsible for the general conduct of the study and indemnify the study centre against any  
28 claims, arising from any negligent act or omission by the hospital in fulfilling the sponsor  
29 role in respect to the study.  
30  
31  
32  
33

### 34 **SOURCES OF FUNDING**

35  
36  
37  
38 The study is funded by the University Hospitals Birmingham Charities.  
39  
40  
41

### 42 **DISCUSSION**

43  
44  
45 This is the first feasibility trial to investigate a HBEP in patients listed for liver  
46 transplantation. To-date 46 patients have been randomly screened for eligibility, of which  
47 32 are eligible and 26 have agreed to participate in the trial.  
48  
49  
50  
51

### 52 **Safety**

53  
54  
55  
56 Few small studies have investigated exercise therapy in patients with liver disease (13-16).  
57 Each study reported the safe use of exercise therapy with no adverse events described.  
58  
59  
60

1  
2  
3 However, participant numbers were small ( $n < 24$ ) and three of the four studies included  
4 patients with only mild liver disease, who are not as high risk as patients with end-stage liver  
5 disease. Furthermore, exercise was supervised by a health professional ensuring that  
6 participants exercised within safe training zones and were able to guide participants when  
7 to stop. To ensure safe delivery of exercise therapy in this study education will be given to  
8 the participant regarding rate of perceived exertion with clear colour coded training zones.  
9 Participants will be advised to stop exercising if reaching above 15 on the RPE score or if  
10 they feel a change in symptoms including dizziness, light headedness and chest pain.  
11 Participants will have contact numbers for the physiotherapists working on the study and  
12 will be advised to inform them if they experience any adverse event. This will also be  
13 automatically checked at the weekly telephone contact. To minimise the risk of adverse  
14 events the design of the exercise programme was based upon well documented training  
15 models delivered to other patients with chronic cardiovascular and respiratory disease.  
16  
17  
18  
19  
20  
21  
22  
23  
24  
25  
26  
27

28 Although this study includes participants with end stage liver disease, certain medical  
29 conditions will be excluded from the study including cardiovascular instability and unstable  
30 encephalopathy to minimise the risk of a serious adverse event. Furthermore, unstable  
31 encephalopathy may affect the participant's ability to consistently and adequately follow  
32 the exercise programme. This would affect the analysis of feasibility, as well as put  
33 unnecessary demand upon the main carer to support the patient through the process.  
34  
35  
36  
37  
38  
39  
40  
41

### 42 **Challenges in study design**

43  
44  
45 There are currently no validated outcome measures to assess change in functional capacity  
46 in patients with end-stage liver disease. The incremental shuttle walk test (ISWT) will be  
47 used in this study because it is a recognised measure of maximal exercise capacity and has  
48 been shown to correlate well with VO<sub>2</sub> peak when compared to the gold standard  
49 cardiopulmonary exercise test (21). It has been previously used to measure change in  
50 functional capacity in other chronic disease types such as respiratory and cardiovascular  
51 disease (22, 23). Moreover, the ISWT has been shown to predict post-surgical morbidity in  
52 patients undergoing abdominal surgery (27).  
53  
54  
55  
56  
57  
58  
59  
60



1  
2  
3  
4  
5 In view of a home-based set up, it is important to promote adherence and compliance to  
6 the exercise programme. Although it is understood that patients listed for liver  
7 transplantation have a lower quality of life it is not understood what the motivational  
8 influences of this patient population are. To promote adherence to the programme a self-  
9 reported diary and an accelerometer will be given to each participant to provide daily visual  
10 feedback and empower responsibility for their daily and weekly goals. Additionally,  
11 following demonstration of the functional resistance exercises at their initial assessment,  
12 participants will be provided with written and pictorial instructions as well as a DVD of all of  
13 the exercises with front and side on views including verbal instruction from an exercise  
14 trainer. At the end of the study, each participant will be invited to attend a focus group to  
15 feedback on their experience of the study with particular reference to the level of support  
16 they receive, the clarity of the programme and motivational influences.  
17  
18  
19  
20  
21  
22  
23  
24  
25  
26

27  
28 Due to the large geographical area, the QEUHB Liver unit covers, participants have to travel  
29 up to 300 miles per clinic appointment. It was, therefore, felt that limiting participant visits  
30 would facilitate recruitment and adherence to the study and reduce participant burden.  
31 Predominantly, patients on the liver transplant waiting list are reviewed on a 6-weekly basis.  
32 Baseline assessments will be timed with their pre-arranged clinic appointment so that 6 and  
33 12-week follow-up will co-inside with ongoing clinic appointments.  
34  
35  
36  
37  
38  
39

40 The HBEP was designed to use movements, which would challenge the cardiorespiratory  
41 system, but also encourage movement through multiple planes of motion to improve  
42 stability, flexibility and balance. Patients with end-stage liver disease vary in age, function  
43 and exercise experience. Exercises were chosen, along with appropriate progression and  
44 regressions, in order to adapt to individual needs. Additionally, 3 levels of intensity will be  
45 available based upon increasing work time and reducing rest time. These will ensure  
46 participants exercise at a level consistent with their exercise capacity, but have room for  
47 progression over the 12 week period.  
48  
49  
50  
51  
52  
53  
54

#### 55 **Future RCT considerations**

56  
57  
58  
59  
60

1  
2  
3 NHS England aims to encourage and support healthier behaviours through the use of NHS  
4 accredited health apps (28). In this current study, participants will record their activity in a  
5 written diary and verbally report back at their weekly telephone support. In a larger RCT the  
6 use of accelerometers with live data collection would be considered. This would aim to  
7 empower patients to proactively monitor their activity and work towards patient centred  
8 goals. Furthermore, the physiotherapist could monitor adherence and progression of the  
9 exercise program on a daily basis. This would not only give better indication to tolerance to  
10 the exercise program but would enable specific exercise intensity advice and avoid  
11 participant reporter bias. However, it is currently unknown if all patients have access to  
12 smart phones for live data to be recorded on an app. Likewise, virtual clinics could be used  
13 instead of telephone support. This would provide a more interactive experience for the  
14 patient. The physiotherapist could review exercise techniques and demonstrate alternatives  
15 as required.  
16  
17  
18  
19  
20  
21  
22  
23  
24  
25  
26  
27

28 This phase 1 trial is critical in understanding potential recruitment rates, withdrawal rates,  
29 patients undergoing transplantation or death in the study period and HBEP completion rates  
30 in order to accurately power the number of participant required for the future RCT.  
31  
32  
33  
34

### 35 SUMMARY

36  
37  
38 To the best of our knowledge this is the first study to investigate a HBEP in patients listed for  
39 liver transplantation. The enrolment of participants to the study was completed in July 2017  
40 and the final results are expected by May 2018.  
41  
42  
43  
44  
45  
46  
47  
48  
49  
50  
51  
52  
53  
54  
55  
56  
57  
58  
59  
60

## REFERENCES

1. Williams R, Aspinall R, Bellis M, Camps-Walsh G, Cramp M, Dhawan A, et al. Addressing liver disease in the UK: a blueprint for attaining excellence in health care and reducing premature mortality from lifestyle issues of excess consumption of alcohol, obesity, and viral hepatitis. *The Lancet*. 2014;384(9958):1953-97.
2. Knaak J, McVey M, Bazerbachi F, Goldaracena N, Spetzler V, Selzner N, et al. Liver transplantation in patients with end-stage liver disease requiring intensive care unit admission and intubation. *Liver Transplantation*. 2015;21(6):761-7.
3. Fried LP, Tangen CM, Walston J, Newman AB, Hirsch C, Gottdiener J, et al. Frailty in Older Adults Evidence for a Phenotype. *The Journals of Gerontology: Series A*. 2001;56(3):M146-M57.
4. Lai JC, Dodge JL, Sen S, Covinsky K, Feng S. Functional decline in patients with cirrhosis awaiting liver transplantation: Results from the functional assessment in liver transplantation (FrAILT) study. *Hepatology*. 2016;63(2):574-80.
5. Moran J, Wilson F, Guinan E, McCormick P, Hussey J, Moriarty J. Role of cardiopulmonary exercise testing as a risk-assessment method in patients undergoing intra-abdominal surgery: a systematic review. *British journal of anaesthesia*. 2016;116(2):177-91.
6. Bernal W, Martin-Mateos R, Lipcsey M, Tallis C, Woodsford K, Mcphail MJ, et al. Aerobic capacity during cardiopulmonary exercise testing and survival with and without liver transplantation for patients with chronic liver disease. *Liver Transplantation*. 2014;20(1):54-62.
7. Epstein SK, Freeman RB, Khayat A, Unterborn JN, Pratt DS, Kaplan MM. Aerobic capacity is associated with 100-day outcome after hepatic transplantation. *Liver Transplantation*. 2004;10(3):418-24.
8. Dunne D, Jack S, Jones R, Jones L, Lythgoe D, Malik H, et al. Randomized clinical trial of prehabilitation before planned liver resection. *British Journal of Surgery*. 2016.
9. Li C, Carli F, Lee L, Charlebois P, Stein B, Liberman AS, et al. Impact of a trimodal prehabilitation program on functional recovery after colorectal cancer surgery: a pilot study. *Surgical endoscopy*. 2013;27(4):1072-82.
10. Ochmann U, Kotschy-Lang N, Raab W, Kellberger J, Nowak D, Jörres RA. Long-term efficacy of pulmonary rehabilitation in patients with occupational respiratory diseases. *Respiration*. 2012;84(5):396-405.
11. Smart N, Steele M. Exercise training in haemodialysis patients: a systematic review and meta-analysis. *Nephrology*. 2011;16(7):626-32.
12. van der Meer S, Zwerink M, van Brussel M, van der Valk P, Wajon E, van der Palen J. Effect of outpatient exercise training programmes in patients with chronic heart failure: a systematic review. *European Journal of Preventive Cardiology*. 2012;19(4):795-803.
13. Williams AM, Waits S, Englesbe MJ. The Importance of Prehabilitation in Liver Transplantation. *Current Transplantation Reports*. 2015;2(4):312-5.
14. Roman E, Garcia-Galceran C, Torrades T, Herrera S, Marin A, Donate M, et al. Effects of an Exercise Programme on Functional Capacity, Body Composition and Risk of Falls in Patients with Cirrhosis: A Randomized Clinical Trial. *PloS one*. 2016;11(3):e0151652.
15. Zenith L, Meena N, Ramadi A, Yavari M, Harvey A, Carbonneau M, et al. Eight weeks of exercise training increases aerobic capacity and muscle mass and reduces fatigue in patients with cirrhosis. *Clin Gastroenterol Hepatol*. 2014;12(11):1920-6 e2.

16. Garcia AM, Veneroso CE, Soares DD, Lima AS, Correia MI. Effect of a physical exercise program on the functional capacity of liver transplant patients. *Transplant Proc.* 2014;46(6):1807-8.
17. Zalewska K. Liver Transplantation: Selection Criteria and Recipient Registration 2017.
18. Borg GA. Psychophysical bases of perceived exertion. *Medicine and science in sports and exercise.* 1982;14(5):377-81.
19. Scherr J, Wolfarth B, Christle JW, Pressler A, Wagenpfeil S, Halle M. Associations between Borg's rating of perceived exertion and physiological measures of exercise intensity. *European Journal of Applied Physiology.* 2013;113(1):147-55.
20. Singh SJ, Morgan M, Scott S, Walters D, Hardman AE. Development of a shuttle walking test of disability in patients with chronic airways obstruction. *Thorax.* 1992;47(12):1019-24.
21. Luxton N, Alison JA, Wu J, Mackey MG. Relationship between field walking tests and incremental cycle ergometry in COPD. *Respirology.* 2008;13(6):856-62.
22. Fowler S, Singh S, Revill S. Reproducibility and validity of the incremental shuttle walking test in patients following coronary artery bypass surgery. *Physiotherapy.* 2005;91(1):22-7.
23. Lee AL, Cecins N, Holland AE, Hill CJ, McDonald CF, Burge AT, et al. Field Walking Tests Are Reliable and Responsive to Exercise Training in People With Non-Cystic Fibrosis Bronchiectasis. *Journal of Cardiopulmonary Rehabilitation and Prevention.* 2015;35(6):439-45.
24. Struthers R, Erasmus P, Holmes K, Warman P, Collingwood A, Sneyd J. Assessing fitness for surgery: a comparison of questionnaire, incremental shuttle walk, and cardiopulmonary exercise testing in general surgical patients†. *British journal of anaesthesia.* 2008;101(6):774-80.
25. Van Reenan M, Janssen B. EQ-5D-5L User Guide: Basic Information on How to Use the EQ-5D-5L Instrument. 2015.
26. Rothenbacher D, Jaensch A, Mons U, Hahmann H, Becker T, Koenig W, et al. Prognostic value of one-year course of symptoms of anxiety and depression in patients with coronary heart disease: Role of physical activity and unmet medical need. *European Journal of Preventive Cardiology.* 2015;22(9):1129-38.
27. Murray P, Whiting P, Hutchinson S, Ackroyd R, Stoddard C, Billings C. Preoperative shuttle walking testing and outcome after oesophagogastrrectomy. *British journal of anaesthesia.* 2007;99(6):809-11.
28. The NHS Five Years Forward View. In: Care Quality Commission PHEaNI, editor.: NHS England; 2014.

## Appendices

### Appendix 1

#### Telephone Questionnaire

1. How many days per week did you achieve your daily step target?

0 1-2 3-4 5-7

If 5-7 please proceed to question 3

2. What prevented you from achieving your daily step target more frequently?

3. How many times did you complete the functional resistance exercise session this week?

None 1 2 3 >3

If >1 please go to question 5

4. What prevented you from completing the functional resistance exercise sessions?

5. Did you experience any of the following symptoms during or after your exercise?

- a. Muscular pain
- b. Wheeziness
- c. Shortness of breath
- d. Light headedness
- e. Dizziness
- f. Headache
- g. Chest pain/discomfort

1  
2  
3  
4  
5  
6  
7  
8  
9  
10  
11  
12  
13  
14  
15  
16  
17  
18  
19  
20  
21  
22  
23  
24  
25  
26  
27  
28  
29  
30  
31  
32  
33  
34  
35  
36  
37  
38  
39  
40  
41  
42  
43  
44  
45  
46  
47

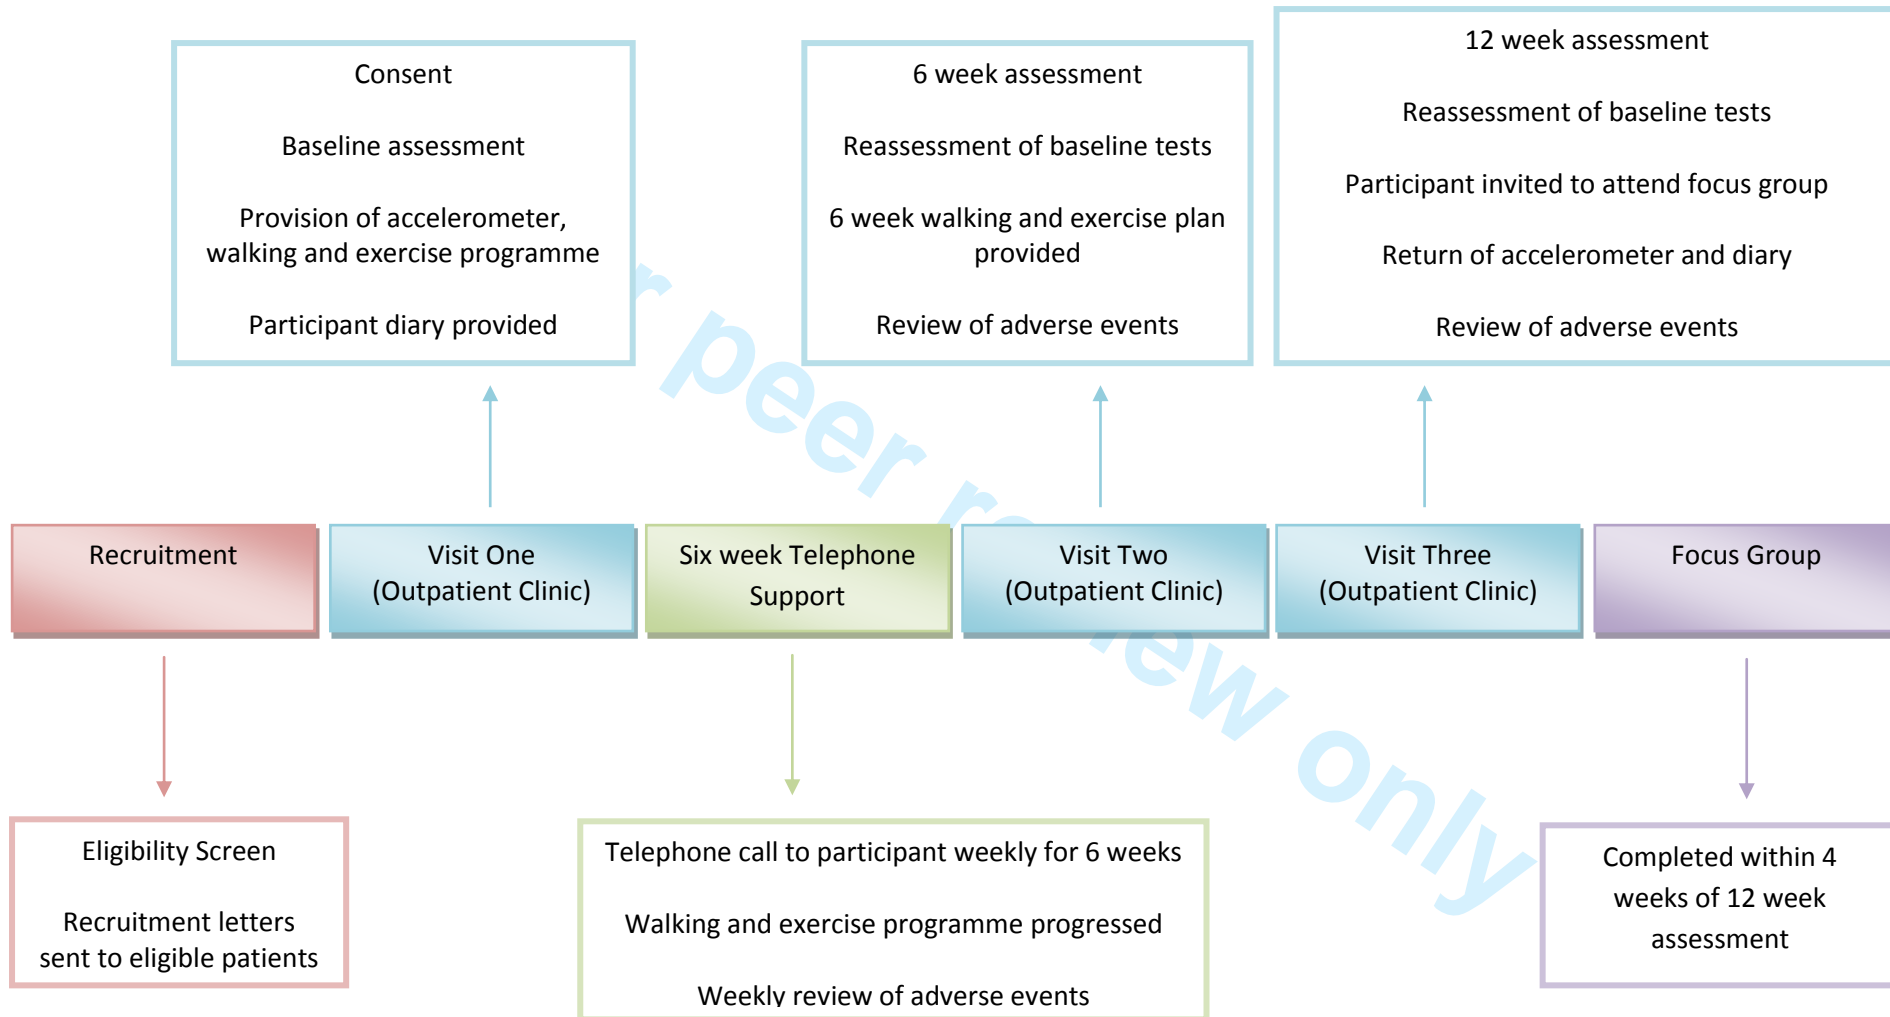



a)

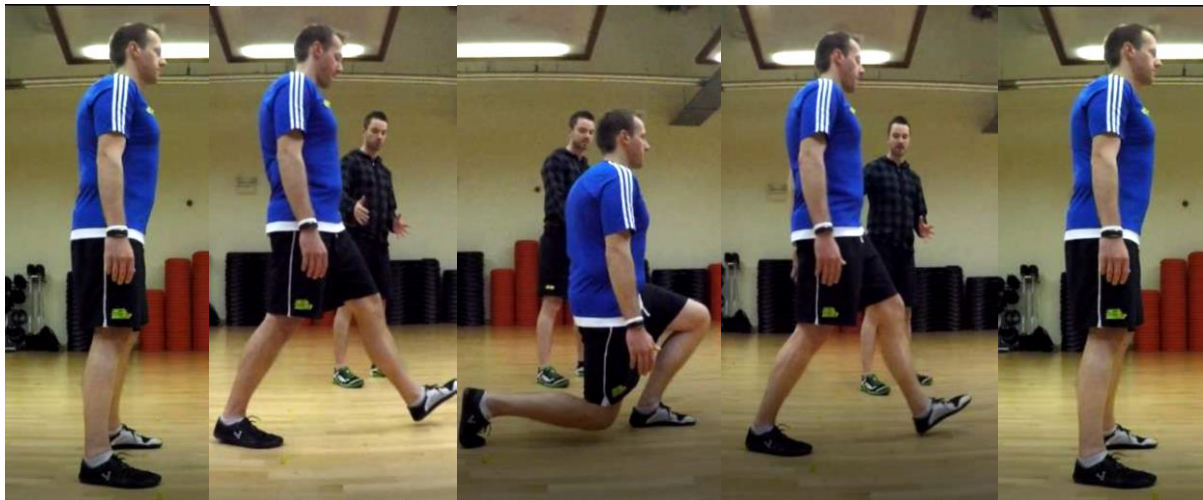

b)

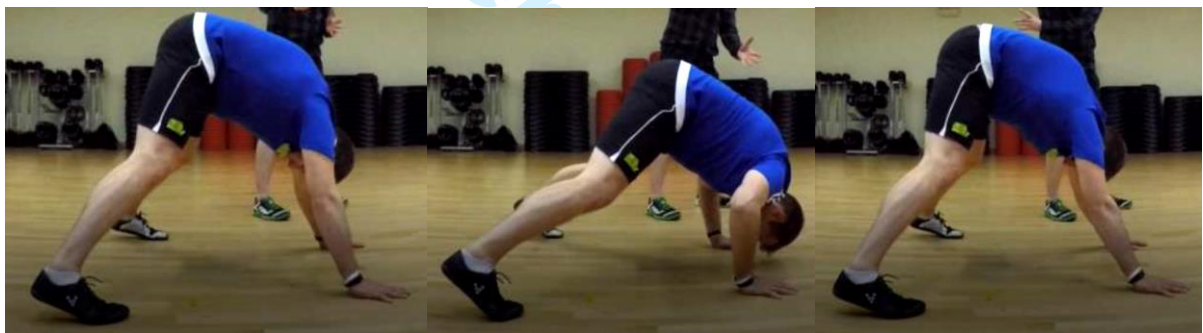

c)

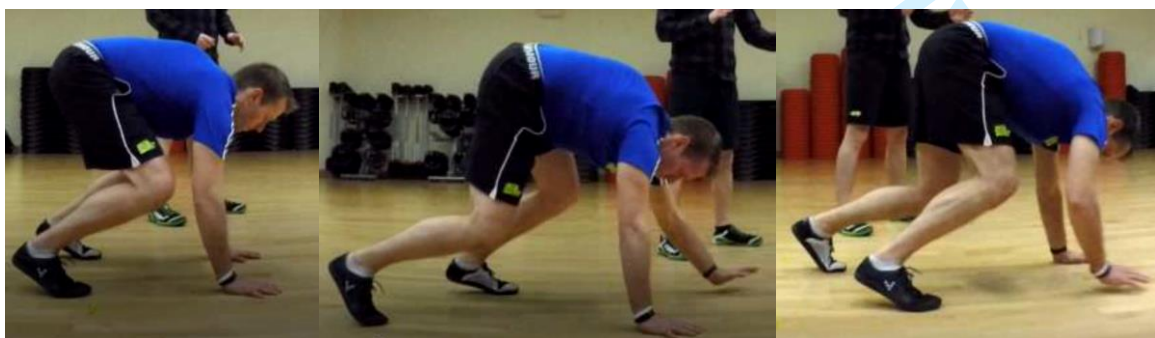

1  
2  
3  
4  
5  
6  
7  
8  
9  
10  
11  
12  
13  
14  
15  
16  
17  
18  
19  
20  
21  
22  
23  
24  
25  
26  
27  
28  
29  
30  
31  
32  
33  
34  
35  
36  
37  
38  
39  
40  
41  
42  
43  
44  
45  
46  
47  
48  
49  
50  
51  
52  
53  
54  
55  
56  
57  
58  
59  
60

**Appendix 1****Telephone Questionnaire**

1. How many days per week did you achieve your daily step target?

0 1-2 3-4 5-7

If 5-7 please proceed to question 3

2. What prevented you from achieving your daily step target more frequently?

3. How many times did you complete the functional resistance exercise session this week?

None 1 2 3 >3

If >1 please go to question 5

4. What prevented you from completing the functional resistance exercise sessions?

5. Did you experience any of the following symptoms during or after your exercise?

- a. Muscular pain
- b. Wheeziness
- c. Shortness of breath
- d. Light headedness
- e. Dizziness
- f. Headache
- g. Chest pain/discomfort



# BMJ Open

## Home-based exercise therapy in patients awaiting liver transplantation: Protocol for an observational feasibility trial

|                                 |                                                                                                                                                                                                                                                                                                                                                                                                                                                                                                                                                                                                                                                                                                                                                                                                                                                                                          |
|---------------------------------|------------------------------------------------------------------------------------------------------------------------------------------------------------------------------------------------------------------------------------------------------------------------------------------------------------------------------------------------------------------------------------------------------------------------------------------------------------------------------------------------------------------------------------------------------------------------------------------------------------------------------------------------------------------------------------------------------------------------------------------------------------------------------------------------------------------------------------------------------------------------------------------|
| Journal:                        | <i>BMJ Open</i>                                                                                                                                                                                                                                                                                                                                                                                                                                                                                                                                                                                                                                                                                                                                                                                                                                                                          |
| Manuscript ID                   | bmjopen-2017-019298.R1                                                                                                                                                                                                                                                                                                                                                                                                                                                                                                                                                                                                                                                                                                                                                                                                                                                                   |
| Article Type:                   | Protocol                                                                                                                                                                                                                                                                                                                                                                                                                                                                                                                                                                                                                                                                                                                                                                                                                                                                                 |
| Date Submitted by the Author:   | 12-Oct-2017                                                                                                                                                                                                                                                                                                                                                                                                                                                                                                                                                                                                                                                                                                                                                                                                                                                                              |
| Complete List of Authors:       | Williams, Felicity; Queen Elizabeth Hospital Birmingham, Physiotherapy<br>Vallance, Alice; Queen Elizabeth Hospital Birmingham, Physiotherapy<br>Faulkner, Thomas; Queen Elizabeth Hospital Birmingham, Anaesthesia<br>Towey, Jennifer; Queen Elizabeth Hospital Birmingham, Dietetics<br>Kyte, Derek; University of Birmingham, Institute of Applied Health Research<br>Durman, Simon; Virgin Active, Solihull, Personal Training<br>Johnson, Jill; Queen Elizabeth Hospital Birmingham, Dietetics<br>Holt, Andrew; Queen Elizabeth Hospital Birmingham, Liver Transplant and Hepatobiliary Pancreatic Unit<br>Perera, T; Queen Elizabeth Hospital Birmingham,<br>Ferguson, James; Queen Elizabeth Hospital Birmingham, Liver Transplant and Hepatobiliary Pancreatic Unit<br>Armstrong, Matthew; University of Birmingham, NIHR Biomedical Research Unit and Centre for Liver Research |
| <b>Primary Subject Heading</b>: | Gastroenterology and hepatology                                                                                                                                                                                                                                                                                                                                                                                                                                                                                                                                                                                                                                                                                                                                                                                                                                                          |
| Secondary Subject Heading:      | Surgery, Sports and exercise medicine, Rehabilitation medicine                                                                                                                                                                                                                                                                                                                                                                                                                                                                                                                                                                                                                                                                                                                                                                                                                           |
| Keywords:                       | Prehabilitation, Functional capacity, End-stage liver disease, Liver transplantation                                                                                                                                                                                                                                                                                                                                                                                                                                                                                                                                                                                                                                                                                                                                                                                                     |
|                                 |                                                                                                                                                                                                                                                                                                                                                                                                                                                                                                                                                                                                                                                                                                                                                                                                                                                                                          |

SCHOLARONE™  
Manuscripts

# Home-based exercise therapy in patients awaiting liver transplantation: Protocol for an observational feasibility trial

## AUTHORS

Williams FR<sup>1\*</sup>, Vallance A<sup>1</sup>, Faulkner T<sup>2</sup>, Towey J<sup>3</sup>, Kyte D<sup>4</sup>, Durman S<sup>5</sup>, Johnson J<sup>3</sup>, Holt A<sup>6</sup>, Perera T<sup>6</sup>, Ferguson J<sup>6</sup> and Armstrong MJ<sup>6</sup>.

<sup>1</sup>Department of Physiotherapy, Queen Elizabeth University Hospital Birmingham, Birmingham, UK

<sup>2</sup>Department of Anaesthesia, Queen Elizabeth University Hospital Birmingham, Birmingham, UK

<sup>3</sup>Department of Dietetics, Queen Elizabeth University Hospital Birmingham, Birmingham, UK

<sup>4</sup>Centre for Patient-Reported Outcomes Research, Institute of Applied Health Research, College of Medical and Dental Sciences, University of Birmingham, UK

<sup>5</sup>Virgin Active, Blythe Valley Business Park, Solihull, Birmingham, UK

<sup>6</sup> Liver Transplant and Hepatobiliary pancreatic unit, Queen Elizabeth University Hospital Birmingham, Birmingham, UK

\*Corresponding author

Email: flickwilliams31@gmail.com

Address: Physiotherapy Department, Therapy South Suite, Level 1, Queen Elizabeth Hospital Birmingham, Mindelsohn Way, B15 2GW

**Competing interests:** All authors have no conflict of interests to declare.

**ABSTRACT**

**Introduction:** Liver disease is the third commonest cause of premature mortality in the UK. Liver failure accelerates frailty resulting in skeletal muscle atrophy, functional decline and an associated risk of liver transplant waiting list mortality. However, there is limited research investigating the impact of exercise on patient outcomes pre-and post-liver transplantation. The waitlist period for patients listed for liver transplantation provides a unique opportunity to provide and assess interventions such as prehabilitation.

**Method and Analysis:** This study is a phase I observational study evaluating the feasibility of conducting a randomised control trial (RCT) investigating the use of a home-based exercise program (HBEP) in the management of patients awaiting liver transplantation. Twenty eligible patients will be randomly selected from the Queen Elizabeth Hospital Birmingham Liver Transplant waiting list. Participants will be provided with an individually tailored twelve week HBEP, including step targets and resistance exercises. Activity trackers and patient diaries will be provided to support data collection. For the initial six weeks, telephone support will be given to discuss compliance with the study intervention, achievement of weekly targets, and to address any queries or concerns regarding the intervention. During weeks 6-12, participants will continue the intervention without telephone support to evaluate longer-term adherence to the study intervention. On completing the intervention, all participants will be invited to engage in a focus group to discuss their experiences and the feasibility of a RCT.

**Ethics and Dissemination:** The protocol is approved by the National Research Ethics Service Committee North West - Greater Manchester East and Health Research Authority (REC reference: 17/NW/0120). Recruitment into the study started in April 2017 and ended in July 2017. Follow-up of participants is ongoing and due to finish by the end of 2017. The findings of this study will be disseminated through peer-reviewed publications and international presentations. In addition, the protocol will be placed on the British Liver Trust website for public access.

**Registration:** [clinicaltrials.gov/NCT02949505](http://clinicaltrials.gov/NCT02949505)

**Keywords:** Prehabilitation, functional capacity, end-stage liver disease, liver transplantation.

**Financial and other competing interests:** None to declare.

**Strengths:**

1. This is the first study to investigate a home based exercise programme in patients with end-stage liver disease and listed for liver transplantation.
2. An extensive clinical evaluation of functional capacity and quality of life in a high risk group of patient in whom there is a pressing need for optimisation prior to transplantation.

**Limitations:**

1. A pilot study of small sample size, but with the aim and design focusing on the feasibility of a RCT of prehabilitation in patients awaiting liver transplantation.

## INTRODUCTION

Liver disease is the third commonest cause of premature mortality in the UK (1). Currently, a liver transplant is the only cure for end-stage liver disease (2). The existing shortage of donor organs highlights the importance of being able to accurately identify those individuals whom will benefit the most from transplantation.

Frailty is defined as the biologic syndrome of decreased reserve and resistance to stressors, which cause vulnerability to adverse outcomes (3). Liver failure accelerates this process, resulting in skeletal muscle atrophy (sarcopenia), reduced functional capacity and an associated increased risk of liver transplant waiting list mortality (4).

Evidence suggests that a subgroup of patients with end-stage liver disease who have low functional capacity, defined as an anaerobic threshold of less than  $9\text{mL}\cdot\text{kg}^{-1}\cdot\text{min}^{-1}$ , have lower survival rates post-transplantation(5) and predict a longer hospital stay (6). Despite these findings, current management of end-stage liver disease tends to focus on preventing

1  
2  
3 and treating complications (i.e. variceal haemorrhage, ascites), rather than prospective  
4 strategies to improve functional capacity.  
5  
6

7  
8 Research in non-end-stage liver disease populations has demonstrated the potential role of  
9 pre-operative exercise programmes, 'known as prehabilitation', in optimising patient's  
10 functional capacity prior to abdominal surgery and reducing post-operative complications  
11 (7, 8). Furthermore, exercise training has been shown to improve functional capacity and  
12 quality of life in a wide variety of chronic diseases (9-11). The time period for patients whilst  
13 active on the liver transplant waiting list provides a unique opportunity to provide physical  
14 interventions, such as prehabilitation. This could potentially have a significant effect on  
15 short, medium and long-term outcomes at a relatively low cost (12).  
16  
17

18  
19 Recently, studies have demonstrated significant improvement in functional capacity  
20 following delivery of an exercise programme in patients with all causes of liver disease (13-  
21 17). Furthermore, significant improvements in muscle mass (14, 15) and EuroQol Group EQ-  
22 visual analogue of self-perceived health status (15) were shown. Although, all studies  
23 suggest exercise is a safe intervention in this patient population, 3 of the 5 studies excluded  
24 patients with end-stage cirrhosis (14-16). In view of this, as well as small participant  
25 numbers in each study, the safety of this intervention cannot be certain. Moreover, all  
26 studies were undertaken with weekly, directly supervised exercise sessions only. The seven  
27 UK NHS Liver Transplant centres cover a vast geographical area, therefore twice weekly  
28 visits by patients to their nearest transplant centre is unlikely to be feasible. Interventions  
29 which can be conducted local to the patient's homes or indeed in the patient's own homes  
30 need to be evaluated in a RCT.  
31  
32  
33  
34  
35  
36  
37  
38  
39  
40  
41  
42  
43  
44  
45  
46

47 Before a RCT can be conducted, a feasibility study is required to determine if a larger trial is  
48 possible, and if so, outline the optimal design features. Therefore, the aim of this study is to  
49 conduct a single centre feasibility trial of a novel home-based exercise programme in  
50 patients with end-stage liver disease awaiting liver transplantation.  
51  
52  
53  
54  
55  
56  
57  
58  
59  
60

## METHODS AND ANALYSIS

### Study Design Overview

The proposed feasibility trial is a single arm, single centre, study of a home-based exercise programme (HBEP) for patients listed for liver transplantation.

Patients recruited to the study at the Queen Elizabeth University Hospital Birmingham (QEUHB) UK liver transplant unit will be treated with a 12-week HBEP (Figure 1). Functional capacity, health related quality of life, anxiety and depression, anthropometry and adverse events will be assessed at baseline, 6 weeks and 12 weeks after the study intervention is commenced.

On completion of the HBEP intervention participants will be invited to attend a process evaluation focus group. The purpose of the focus group is to identify attitudes, motivators and barriers to the study intervention as well as to reflect upon the usefulness/acceptability of the study materials and equipment. Data will be collected and used to address the research questions outlined in Box 1.

#### Box 1 – Process Evaluation Focus Group Research Questions

1. What motivated the participants to adhere to the study intervention?
2. Did the participants identify any barriers to completing the study intervention?
3. How useful did the participants find the accelerometers?
4. How useful did the participants find the weekly telephone support?

Figure 1

## Ethical and Regulatory Approval

The National Research Ethics Service (NRES) Committee and Health Research Authority North West - Greater Manchester East (REC reference: 17/NW/0120) approved version 1.1 of the study protocol. The NRES, HRA and UHB Research and Dissemination group will be informed of any protocol modifications within 7 days. All participants will provide informed written consent.

## Sample and Selection

Twenty eligible patients will be selected from the QEUHB liver transplantation waiting list using a stratified random sampling method, completed by MJA. Subgroups will include four patients from each of the following disease types; alcoholic liver disease, non-alcoholic fatty liver disease, autoimmune liver disease, genetic liver disease and viral hepatitis. This is to ensure that various forms of liver disease will be represented in the study. Patients will be eligible to be included in the study if they meet the following criteria:

### *Inclusion criteria:*

- Meet the UK Liver Transplant criteria for listing (18)
- Accepted on the liver transplant waiting list for a primary transplant
- Adults  $\geq 18$  years

### *Exclusion criteria:*

- Significant cardiovascular instability including a recent MI, recent CVA and/or a recent unstable cardiac arrhythmia
- Unstable encephalopathy - open to interpretation by the chief investigator
- Neither patient or next of kin non-English speaking
- Inpatient at the time of screening
- Refusal or lacks capacity to give informed consent

1  
2  
3  
4  
5 Once deemed eligible, patients will be sent a letter of invitation to be involved in the study  
6 along with a participant information sheet. Patients will be contacted by telephone 5-7 days  
7 after the letters are sent by the chief investigator or a nominated member of the research  
8 team. If participants are willing to take part, an appointment will be arranged within 6  
9 weeks, when patients will be able to provide informed written consent.  
10  
11  
12  
13

## 14 15 16 17 **Method** 18 19

20  
21 Patients on the QEUHB liver transplant waiting list routinely attend outpatient clinics on 6-  
22 weekly basis. All study visits will be incorporated into their routine clinic follow-up. On  
23 attendance to clinic (baseline study visit), participants will complete baseline assessments of  
24 functional capacity, anthropometry and questionnaires to assess quality of life and anxiety  
25 and depression. The study intervention will be completed for 6 weeks with weekly  
26 telephone support, including a telephone questionnaire (see appendix 1). On return to clinic  
27 at week 6 (study visit 2), functional capacity, quality of life and anxiety/depression scores  
28 will be re-assessed. For the remaining 6 weeks of the study participants will continue with  
29 the HBEP, but without telephone support. This is to assess the carryover effect of  
30 information provided and assess the ability of the participants to continue the HBEP  
31 independently whilst on the waiting list. On return to clinic at 12 weeks (study visit 3) all  
32 participants will be re-assessed in terms of functional capacity, quality of life and anxiety  
33 scores. If a participant is unable to participate in exercise due to illness for a week or  
34 number of weeks then intermittent participation will be permitted. Periods of illness and  
35 intermittent participation will be recorded on the case report form (CRF) and accounted for  
36 in the data analysis.  
37  
38  
39  
40  
41  
42  
43  
44  
45  
46  
47  
48  
49

## 50 51 **Intervention: home based exercise programme (HBEP)** 52 53

54 Participants will be provided with a 6 week HBEP including daily step targets and functional  
55 resistance-based exercises (Figure 2). Participants will be provided with an accelerometer  
56 (COOSA Heart Rate Monitor) to aid tracking of their daily steps and activity levels. In  
57  
58  
59  
60



1  
2  
3 addition, participants will be asked to record their activity in a diary to aid self-reporting at  
4 the weekly telephone contact.  
5  
6

7  
8 *Daily step programme* – During the first week, participants will be asked to monitor their  
9 daily step count via their accelerometer. Following weekly telephone contact, the  
10 participant will be advised to increase their daily step count by 200-500 steps each day  
11 every week depending on the level of function and achievement of step target of the  
12 previous week.  
13  
14  
15  
16

17  
18 *Functional resistance exercise sessions* – During the initial assessment patients will be taught  
19 functional resistance exercises to complete at home (Figure 2). Information provided will be  
20 followed up with an exercise worksheet as well as a video to aid patient understanding and  
21 adherence. Exercises will be regressed if the participant is unable to complete any of the  
22 techniques demonstrated in figure 2. For example, a step or bed will be used for hand  
23 positioning in the rock press and bear crawl exercises. The public and patient involvement  
24 (PPI)\_group advised to keep exercise sessions short to aid compliance. Therefore, sessions  
25 will be 20-25 minutes for each individual but the difficulty of the session will be split into 5  
26 levels as described in table 1. Participants will be advised to complete the level most  
27 suitable for them depending upon their baseline functional capacity scores. Participants will  
28 be asked to achieve a work rate of 12-13 on the BORG Rate of Perceived Exertion (RPE)  
29 score (6-20 scale) (19). An RPE of 12-13 has been shown to correlate with anaerobic  
30 threshold in healthy individuals (20) and will therefore guide the participants to work to a  
31 training level which will elicit change in functional capacity. Participants will be advised to  
32 stop exercising if reaching above 15 on the RPE score or if they feel a change in symptoms  
33 including dizziness, light headedness and chest pain. Participants will be advised to progress  
34 to each level depending on their RPE scores and results of the telephone health call  
35 questionnaire. At the 6 week assessment, participants will be advised to progress to a  
36 different level of exercise and to continue to increase their step count by 200-500 steps per  
37 day, per week depending upon the results of their functional capacity scores. Additional  
38 exercises, as shown in level 4 and 5 in table 1, will be taught if needed.  
39  
40  
41  
42  
43  
44  
45  
46  
47  
48  
49  
50  
51  
52  
53  
54  
55  
56  
57  
58  
59  
60

**Table 1 – Levels of Difficulty for each Exercise Session**

| Level | Exercises                                                                     | Work to rest timings                     | Number of circuits | Total Session Time (mins) |
|-------|-------------------------------------------------------------------------------|------------------------------------------|--------------------|---------------------------|
| 1     | Frog Squat<br>Rock Press<br>Lunge<br>Bear Crawl                               | 20 secs of each exercise<br>40 secs rest | 5                  | 20                        |
| 2     | Frog Squat<br>Rock Press<br>Lunge<br>Bear Crawl                               | 30 secs of each exercise<br>30 secs rest | 5                  | 20                        |
| 3     | Frog Squat<br>Rock Press<br>Lunge<br>Bear Crawl                               | 40 secs of each exercise<br>20 secs rest | 5                  | 20                        |
| 4     | Frog Squat<br>Rock Press<br>Lunge<br>Bear Crawl<br>Side Bear Crawl            | 40 secs of each exercise<br>20 secs rest | 4                  | 20                        |
| 5     | Frog Squat<br>Rock Press<br>Lunge<br>Bear Crawl<br>Side Bear Crawl<br>Kicksit | 40 secs of each exercise<br>20 secs rest | 4                  | 24                        |

*Telephone Health Call* - During the first 6 weeks of the study intervention, participants will receive one 20 minute telephone call weekly from the chief investigator or a nominated member of the research team. The purpose of the telephone call is to provide support and guidance with the study intervention and address the following areas:

- Compliance to the study intervention
- Achievement of weekly pre-agreed step count and functional resistance exercise level
- Step target for the following week
- Queries or concerns regarding the intervention
- Incidence of any adverse events

1  
2  
3 After 6 weeks of the HBEP study intervention, participants will continue with the  
4 intervention without telephone support. This aims to assess longer-term adherence to the  
5 study intervention without weekly telephone support.  
6  
7  
8  
9

### 10 *Process Evaluation Focus Group*

11 Within 6 weeks of completing the 12-week study intervention all participants will be invited  
12 to attend one of two focus groups. The chief investigator, along with a member of the  
13 research team, will conduct two focus groups aiming to: (i) explore the  
14 thoughts/experiences of the participants regarding the study process, (ii) explore  
15 acceptability of the exercise programme and support provided. All participants will be  
16 invited to capture the range of participant experiences.  
17  
18  
19  
20  
21  
22  
23  
24  
25  
26

## 27 **Figure 2**

### 30 **OUTCOME MEASURES**

#### 31 **Primary Outcome**

32 The primary outcome of the study is feasibility whereby the decision to proceed to a RCT  
33 will be made upon the following criteria:  
34  
35  
36  
37

- 38 1. No serious adverse events (defined as grade  $\geq 3$ ) directly related to the HBEP
  - 39 2. >66% of the active transplant waiting list for primary grafts must meet the eligibility criteria,  
40 to achieve timely recruitment and representation of the cohort
  - 41 3. >90% recruitment to target number of participants (n=20) during the allotted study time  
42 period to achieve timely recruitment and assess willingness of patients to participate
  - 43 4. >66% compliance with the step count (including ranges) whilst active on the transplant  
44 waiting list
  - 45 5. >66% compliance with resistance exercises whilst active on the transplant waiting list
  - 46 6. Of those who undergo initial assessment, >66% complete 6-weeks HBEP
- 47  
48  
49  
50  
51  
52  
53  
54  
55  
56  
57  
58  
59  
60

1  
2  
3  
4  
5 Feedback will be documented from those participants who are approached but who refuse  
6 to consent or withdraw from the study, on the understanding that this feedback will be  
7 optional.  
8  
9

### 10 11 12 **Candidate Primary Outcomes**

13  
14  
15 The following candidate outcomes will be assessed at baseline (pre-HBEP), after 6 and 12  
16 weeks of the HBEP. Feasibility will be determined according to the acceptability and  
17 usefulness of these outcome measures as well as time and resources needed to collect data.  
18  
19

20  
21  
22 Anthropometry: - At each study visit body mass index (BMI), hand grip strength (kg) (Cranlea  
23 Human Performance Digital Hand Grip Dynamometer) , mid-arm circumference (cm) and  
24 triceps skin fold (mm) (Holtain Tanner/Whitehouse Skinfold Caliper) will be assessed. These  
25 assessments are currently completed as part of standard care by the QEUHB Liver Dietetic  
26 team and will be used in the study to ensure control of variables and inform the researches  
27 of any change in nutrition.  
28  
29  
30  
31  
32

33  
34  
35 Incremental shuttle walk test (ISWT): - The ISWT is a standardised, externally paced,  
36 incremental field-walking test which evaluates maximal exercise capacity. The patient is  
37 progressively stressed to a symptom limited maximal performance by walking at different  
38 speeds around a 10m course which is dictated by an audio signal. It is a reliable (21) and  
39 valid measure which has been used in a wide range of chronic diseases (22-24) as well as a  
40 predictor of mortality post-abdominal surgery (25).  
41  
42  
43  
44  
45

46  
47 Short Performance Battery (SPB) test: - It is a physical functional tool which can identify  
48 disability and predict mortality through assessment of gait speed, balance and repeated  
49 chair stands. It is a valid tool used within the liver cirrhosis patient population. A score of  
50 less than 9 has been associated with a 45% increase in waiting list mortality in patients listed  
51 for liver transplantation, independent of the model for end stage liver disease (MELD) score  
52 (4).  
53  
54  
55  
56  
57  
58  
59  
60

1  
2  
3 EQ-5D (version 2.1): - This is a reliable and validated tool used in a wide range of health  
4 conditions and treatments. It provides information on health status which will be used to  
5 help evaluate the clinical and economic value of the study intervention (26).  
6  
7  
8

9  
10 Hospital Anxiety and Depression Score (HADS): - This is a reliable and valid tool for assessing  
11 anxiety and depression in medical patients (27). It will be used to identify if there is a need  
12 to include psychological support in future larger research projects. Participants will be  
13 advised in the participant information sheet that the purpose of the study is not to address  
14 any anxiety or depression concerns and if they feel this is a concern they should contact  
15 their general practitioner.  
16  
17  
18  
19

20  
21  
22 Telephone questionnaire: - This will be completed weekly throughout the first 6 weeks of  
23 the study intervention. The telephone questionnaire provides a standardised framework for  
24 assessing the participant's weekly progress and identifying any areas of concern.  
25  
26 Furthermore, the answers will provide guided goal setting for the following week.  
27  
28  
29

### 30 31 **Other Outcomes**

32  
33  
34

35 Disease severity: - To understand the relationship between the severity of liver disease and  
36 functional capacity at baseline, and possibly inform the need for stratification in the future  
37 RCT, the Child-Turcotte-Pugh (CP), Model for End Stage Liver Disease (MELD) and the United  
38 Kingdom Model for End Stage Liver Disease (UKELD) will be reported. These scores will be  
39 used to compare the study sample selected with the entire waiting list to ensure there is a  
40 representative balance of disease severity in the study. In addition, these scores will be  
41 calculated at 6 and 12 weeks to inform future hypothesis development for the future RCT.  
42  
43  
44  
45  
46  
47  
48

49 Number and reason for dropouts: - All registered dropouts will be recorded according to  
50 their reason including; (1) withdrawal of consent, (2) liver transplantation, (3) acute  
51 decompensation leading to incapacity to follow the study intervention, or (4) death. This will  
52 provide valuable information when planning recruitment for the RCT.  
53  
54  
55  
56  
57  
58  
59  
60

## DATA ANALYSIS PLAN

All quantitative data will be entered into a purposefully designed secure access database and exported to SPSS for statistical analysis (Version 24). Feasibility decision rules and primary candidate outcomes will be analysed and presented using descriptive statistics.

Adverse events reported by telephone or in person will be descriptively reported in terms of frequency (%). To determine compliance with the intervention, the number of days when participants achieved their step count and completed the functional resistance exercises will be reported as categorical variables on a week by week basis (week 1-5).

Two focus groups will be conducted with three thematic components 1) barriers to the intervention, 2) facilitators of adherence and 3) level of support received, although, where appropriate, sufficient scope will be given to explore novel themes. Two members of the research team will conduct the focus group. Each session will be digitally recorded, transcribed verbatim and uploaded into NVivo 10 software to aid organisation and analysis of data. NVivo will be used to store data transcripts, and as a means by which codes could be highlighted and collated based upon the themes described above as well as to explore any new emerging themes.

## ADVERSE EVENTS AND ANALYSIS

An adverse event (AE) would be unlikely in this study due to the extensive investigations the patients have undergone prior to being listed for liver transplantation. However, the reporting period for AE will start at initial screening and continued until the end of the second focus group. Serious adverse events (SAE) will be reported until 30 days post each participant's liver transplant. All SAEs and adverse reactions will be evaluated and recorded using the National Cancer Institute's common terminology criteria for AEs (CTCAE, V.4.0, 2010) and reported to the Principle Investigator. All SAEs will be reported to the sponsor's Research and Development department via the SAE form in the CRF. Only those events classified as probable or definitely related will be reported to the Research Ethics Committee.

## STORAGE OF DATA

All data for an individual participant will be collected by the Principal Investigator or their delegated nominees and recorded in the CRF. Participant identification on the CRF will be through their unique Participant Study Number, which will be allocated at the time of consideration for the study. Data will be collected from the time the patient is considered for entry into the study through to 30 days after they receive their liver transplant. All clinical data will be stored as per NHS regulations and held on the UK National Transplant Database.

Data from the CRF will be entered into a secure password protected database held on the University Hospitals Birmingham Trust computer. Due care will be taken to ensure data safety and integrity, and compliance with the Data Protection Act 1998. All essential documentation and trial records will be stored in conformance with the applicable regulatory requirements and access to stored information will be restricted to authorized personnel. Coded research data will be stored for 5 years anonymously under the property of University Hospitals Birmingham in keeping with good clinical practice.

## CASE REPORT FORM

CRFs will include baseline/follow-up functional capacity, anthropometry and questionnaire scores to capture changes in outcomes. Other CRFs incorporated in the electronic database will include: medical history; eligibility screening; date of transplant; donor organ and operation data, length of ITU stay; 30-day outcome post-transplant; safety monitoring; AE reporting; study treatment adherence and attendance to focus groups.

## SPONSORSHIP, INDEMNITY AND MONITORING

QEUHB will act as the sponsor through the duration of the study. As sponsor, QEUHB will be responsible for the general conduct of the study and indemnify the study centre against any

1  
2  
3 claims, arising from any negligent act or omission by the hospital in fulfilling the sponsor  
4 role in respect to the study.  
5  
6

7  
8 Contact name of trial sponsor: Dr. Chris Counsell  
9

10 Contact information of trial sponsor: chris.counsell@uhb.nhs.uk  
11

## 12 13 **SOURCES OF FUNDING**

14  
15  
16  
17 The study is funded by the University Hospitals Birmingham Charities.  
18  
19

## 20 21 **DISCUSSION**

22  
23  
24 This is the first feasibility trial to investigate a HBEP in patients listed for liver  
25 transplantation. To-date 46 patients have been randomly screened for eligibility, of which  
26 32 are eligible and 26 have agreed to participate in the trial.  
27  
28  
29

### 30 31 **Safety**

32  
33  
34  
35 Few small studies have investigated exercise therapy in patients with chronic liver disease  
36 (13-16). Each study reported the safe use of exercise therapy with no adverse events  
37 described. However, participant numbers were small ( $n < 24$ ) and three of the four studies  
38 included patients with only mild liver disease, who are not as high risk as patients with end-  
39 stage liver disease. Furthermore, exercise was supervised by a health professional ensuring  
40 that participants exercised within safe training zones and were able to guide participants  
41 when to stop. To ensure safe delivery of exercise therapy in this study education will be  
42 given to the participant regarding rate of perceived exertion with clear colour coded training  
43 zones. Furthermore, participants will have contact numbers for the physiotherapists  
44 working on the study and will be advised to inform them if they experience any adverse  
45 event. This will also be automatically checked at the weekly telephone contact. To minimise  
46 the risk of adverse events the design of the exercise programme was based upon well  
47 documented training models delivered to other patients with chronic cardiovascular and  
48  
49  
50  
51  
52  
53  
54  
55  
56  
57  
58  
59  
60



1  
2  
3 respiratory disease in terms of number of sessions per week, length of exercise programme  
4 (6-12 weeks), and intensity (28, 29).  
5  
6  
7

8 Although this study includes participants with end stage liver disease, certain medical  
9 conditions will be excluded from the study including cardiovascular instability and unstable  
10 encephalopathy to minimise the risk of a serious adverse event. Furthermore, unstable  
11 encephalopathy may affect the participant's ability to consistently and adequately follow  
12 the exercise programme. This would affect the analysis of feasibility, as well as put  
13 unnecessary demand upon the main carer to support the patient through the process.  
14  
15  
16  
17  
18  
19

### 20 21 22 **Challenges in study design** 23

24  
25  
26 There are currently no validated outcome measures to assess change in functional capacity  
27 in patients with end-stage liver disease. The incremental shuttle walk test (ISWT) will be  
28 used in this study because it is a recognised measure of maximal exercise capacity and has  
29 been shown to correlate well with VO<sub>2</sub> peak when compared to the gold standard  
30 cardiopulmonary exercise test (22). It has been previously used to measure change in  
31 functional capacity in other chronic disease types such as respiratory and cardiovascular  
32 disease (23, 24). Moreover, the ISWT has been shown to predict post-surgical morbidity in  
33 patients undergoing abdominal surgery (30).  
34  
35  
36  
37  
38  
39

40  
41  
42 In view of a home-based set up, it is important to promote adherence and compliance to  
43 the exercise programme. Although it is understood that patients listed for liver  
44 transplantation have a lower quality of life, compared to healthy individuals, it is not  
45 understood what the motivational influences of this patient population are. To promote  
46 adherence to the programme a self-reported diary and an accelerometer will be given to  
47 each participant to provide daily visual feedback and empower responsibility for their daily  
48 and weekly goals. Additionally, following demonstration of the functional resistance  
49 exercises at their initial assessment, participants will be provided with written and pictorial  
50 instructions as well as a DVD of all of the exercises with front and side on views including  
51 verbal instruction from an exercise trainer. At the end of the study, each participant will be  
52  
53  
54  
55  
56  
57  
58  
59  
60

1  
2  
3 invited to attend a focus group to feedback on their experience of the study with particular  
4 reference to the level of support they receive, the clarity of the programme and  
5 motivational influences.  
6  
7

8  
9  
10 Due to the large geographical area, the QEUHB Liver unit covers, participants have to travel  
11 up to 300 miles per clinic appointment. It was, therefore, felt that limiting participant visits  
12 would facilitate recruitment and adherence to the study and reduce participant burden.  
13 Predominantly, patients on the liver transplant waiting list are reviewed on a 6-weekly basis.  
14 Baseline assessments will be timed with their pre-arranged clinic appointment so that 6 and  
15 12-week follow-up will co-inside with ongoing clinic appointments.  
16  
17  
18  
19  
20

21  
22 The HBEP was designed to use movements, which would challenge the cardiorespiratory  
23 system, but also encourage movement through multiple planes of motion to improve  
24 stability, flexibility and balance. Patients with end-stage liver disease vary in age, function  
25 and exercise experience. Exercises were chosen, along with appropriate progression and  
26 regressions, in order to adapt to individual needs. Additionally, 5 levels of intensity will be  
27 available based upon increasing work time and reducing rest time. These will ensure  
28 participants exercise at a level consistent with their exercise capacity, but have room for  
29 progression over the 12 week period.  
30  
31  
32  
33  
34  
35  
36  
37

### 38 **Future RCT considerations**

39  
40  
41 NHS England aims to encourage and support healthier behaviours through the use of NHS  
42 accredited health apps (31). In this current study, participants will record their activity in a  
43 written diary and verbally report back at their weekly telephone support. In a larger RCT the  
44 use of accelerometers with live data collection would be considered. This would aim to  
45 empower patients to proactively monitor their activity and work towards patient centred  
46 goals. Furthermore, the physiotherapist could monitor adherence and progression of the  
47 exercise program on a daily basis. This would not only give better indication to tolerance to  
48 the exercise program but would enable specific exercise intensity advice and avoid  
49 participant reporter bias. However, it is currently unknown if all patients have access to  
50 smart phones for live data to be recorded on an app. Likewise, virtual clinics could be used  
51  
52  
53  
54  
55  
56  
57  
58  
59  
60

1  
2  
3 instead of telephone support. This would provide a more interactive experience for the  
4 patient. The physiotherapist could review exercise techniques and demonstrate alternatives  
5 as required.  
6  
7  
8  
9

10 This phase 1 trial is critical in understanding potential recruitment rates, withdrawal rates,  
11 patients undergoing transplantation or death in the study period and HBEP completion rates  
12 in order to accurately power the number of participant required for the future RCT.  
13  
14

## 15 16 17 **SUMMARY** 18

19  
20 To the best of our knowledge this is the first study to investigate a HBEP in patients listed for  
21 liver transplantation. The enrolment of participants to the study was completed in July 2017  
22 and the final results are expected by May 2018.  
23  
24  
25  
26  
27

### 28 **Contributor statement:**

29 FRW - concept, design, recruitment and 1st draft and review/editing of final manuscript.  
30 AV, TF, JF and MJA - concept, design, recruitment and review/editing of final manuscript.  
31 DK, SD, JT, JJ, TP, AH - review/editing of final manuscript.  
32 SD - provided consent for use of photographs in Figure 2  
33  
34

### 35 **Acknowledgements:**

36 Mr Brendan Turner<sup>5</sup> – contribution and provided consent for use of photographs in Figure 2  
37  
38  
39

## 40 **Figure Legends**

41  
42 **Figure 1 – Study Design Overview**  
43

44  
45 **Figure 2 - Functional resistance exercises; a) Lunge, b) Rock Press, c) Frog Squat, d) Bear**  
46 **Crawl, e) Side Bear Crawl, f) Kick Sit**  
47  
48  
49  
50  
51  
52  
53  
54  
55  
56  
57  
58  
59  
60

## REFERENCES

1. Williams R, Aspinall R, Bellis M, Camps-Walsh G, Cramp M, Dhawan A, et al. Addressing liver disease in the UK: a blueprint for attaining excellence in health care and reducing premature mortality from lifestyle issues of excess consumption of alcohol, obesity, and viral hepatitis. *The Lancet*. 2014;384(9958):1953-97.
2. Knaak J, McVey M, Bazerbachi F, Goldaracena N, Spetzler V, Selzner N, et al. Liver transplantation in patients with end-stage liver disease requiring intensive care unit admission and intubation. *Liver Transplantation*. 2015;21(6):761-7.
3. Fried LP, Tangen CM, Walston J, Newman AB, Hirsch C, Gottdiener J, et al. Frailty in Older Adults Evidence for a Phenotype. *The Journals of Gerontology: Series A*. 2001;56(3):M146-M57.
4. Lai JC, Dodge JL, Sen S, Covinsky K, Feng S. Functional decline in patients with cirrhosis awaiting liver transplantation: Results from the functional assessment in liver transplantation (FrALIT) study. *Hepatology*. 2016;63(2):574-80.
5. Prentis J, Manas D, I Trenell M, Hudson M, J Jones D, Snowden C. Submaximal cardiopulmonary exercise testing predicts 90-day survival after liver transplantation 2012. 152-9 p.
6. Epstein SK, Freeman RB, Khayat A, Unterborn JN, Pratt DS, Kaplan MM. Aerobic capacity is associated with 100-day outcome after hepatic transplantation. *Liver Transplantation*. 2004;10(3):418-24.
7. Dunne D, Jack S, Jones R, Jones L, Lythgoe D, Malik H, et al. Randomized clinical trial of prehabilitation before planned liver resection. *British Journal of Surgery*. 2016.
8. Li C, Carli F, Lee L, Charlebois P, Stein B, Liberman AS, et al. Impact of a trimodal prehabilitation program on functional recovery after colorectal cancer surgery: a pilot study. *Surgical endoscopy*. 2013;27(4):1072-82.
9. Ochmann U, Kotschy-Lang N, Raab W, Kellberger J, Nowak D, Jörres RA. Long-term efficacy of pulmonary rehabilitation in patients with occupational respiratory diseases. *Respiration*. 2012;84(5):396-405.
10. Smart N, Steele M. Exercise training in haemodialysis patients: a systematic review and meta-analysis. *Nephrology*. 2011;16(7):626-32.
11. van der Meer S, Zwerink M, van Brussel M, van der Valk P, Wajon E, van der Palen J. Effect of outpatient exercise training programmes in patients with chronic heart failure: a systematic review. *European Journal of Preventive Cardiology*. 2012;19(4):795-803.
12. DoH. An Outcome Strategy for COPD and Asthma: NHS Companion Document. [Best Practice Guideline] 2012 [cited 2017 4th October].
13. Williams AM, Waits S, Englesbe MJ. The Importance of Prehabilitation in Liver Transplantation. *Current Transplantation Reports*. 2015;2(4):312-5.
14. Roman E, Garcia-Galceran C, Torrades T, Herrera S, Marin A, Donate M, et al. Effects of an Exercise Programme on Functional Capacity, Body Composition and Risk of Falls in Patients with Cirrhosis: A Randomized Clinical Trial. *PloS one*. 2016;11(3):e0151652.
15. Zenith L, Meena N, Ramadi A, Yavari M, Harvey A, Carbonneau M, et al. Eight weeks of exercise training increases aerobic capacity and muscle mass and reduces fatigue in patients with cirrhosis. *Clin Gastroenterol Hepatol*. 2014;12(11):1920-6 e2.

16. Garcia AM, Veneroso CE, Soares DD, Lima AS, Correia MI. Effect of a physical exercise program on the functional capacity of liver transplant patients. *Transplant Proc.* 2014;46(6):1807-8.
17. Debette-Gratien M, Tabouret T, Antonini M-T, Dalmy F, Carrier P, Legros R, et al. Personalized adapted physical activity before liver transplantation: acceptability and results. *Transplantation.* 2015;99(1):145-50.
18. Zalewska K. Liver Transplantation: Selection Criteria and Recipient Registration 2017.
19. Borg GA. Psychophysical bases of perceived exertion. *Medicine and science in sports and exercise.* 1982;14(5):377-81.
20. Scherr J, Wolfarth B, Christle JW, Pressler A, Wagenpfeil S, Halle M. Associations between Borg's rating of perceived exertion and physiological measures of exercise intensity. *European Journal of Applied Physiology.* 2013;113(1):147-55.
21. Singh SJ, Morgan M, Scott S, Walters D, Hardman AE. Development of a shuttle walking test of disability in patients with chronic airways obstruction. *Thorax.* 1992;47(12):1019-24.
22. Luxton N, Alison JA, Wu J, Mackey MG. Relationship between field walking tests and incremental cycle ergometry in COPD. *Respirology.* 2008;13(6):856-62.
23. Fowler S, Singh S, Revill S. Reproducibility and validity of the incremental shuttle walking test in patients following coronary artery bypass surgery. *Physiotherapy.* 2005;91(1):22-7.
24. Lee AL, Cecins N, Holland AE, Hill CJ, McDonald CF, Burge AT, et al. Field Walking Tests Are Reliable and Responsive to Exercise Training in People With Non-Cystic Fibrosis Bronchiectasis. *Journal of Cardiopulmonary Rehabilitation and Prevention.* 2015;35(6):439-45.
25. Struthers R, Erasmus P, Holmes K, Warman P, Collingwood A, Sneyd J. Assessing fitness for surgery: a comparison of questionnaire, incremental shuttle walk, and cardiopulmonary exercise testing in general surgical patients†. *British journal of anaesthesia.* 2008;101(6):774-80.
26. Van Reenan M, Janssen B. EQ-5D-5L User Guide: Basic Information on How to Use the EQ-5D-5L Instrument. 2015.
27. Rothenbacher D, Jaensch A, Mons U, Hahmann H, Becker T, Koenig W, et al. Prognostic value of one-year course of symptoms of anxiety and depression in patients with coronary heart disease: Role of physical activity and unmet medical need. *European Journal of Preventive Cardiology.* 2015;22(9):1129-38.
28. Bolton CE, Bevan-Smith EF, Blakey JD, Crowe P, Elkin SL, Garrod R, et al. British Thoracic Society guideline on pulmonary rehabilitation in adults: accredited by NICE. *Thorax.* 2013;68(Suppl 2):ii1-ii30.
29. Rehabilitation AoCPiC. Standards for Physical Activity and Exercise in the Cardiovascular Population. 2015 [cited 2017 04.10].
30. Murray P, Whiting P, Hutchinson S, Ackroyd R, Stoddard C, Billings C. Preoperative shuttle walking testing and outcome after oesophagogastrectomy. *British journal of anaesthesia.* 2007;99(6):809-11.
31. The NHS Five Years Forward View. In: Care Quality Commission PHEaNI, editor.: NHS England; 2014.

1  
2  
3  
4  
5  
6  
7  
8  
9  
10  
11  
12  
13  
14  
15  
16  
17  
18  
19  
20  
21  
22  
23  
24  
25  
26  
27  
28  
29  
30  
31  
32  
33  
34  
35  
36  
37  
38  
39  
40  
41  
42  
43  
44  
45  
46  
47  
48  
49  
50  
51  
52  
53  
54  
55  
56  
57  
58  
59  
60

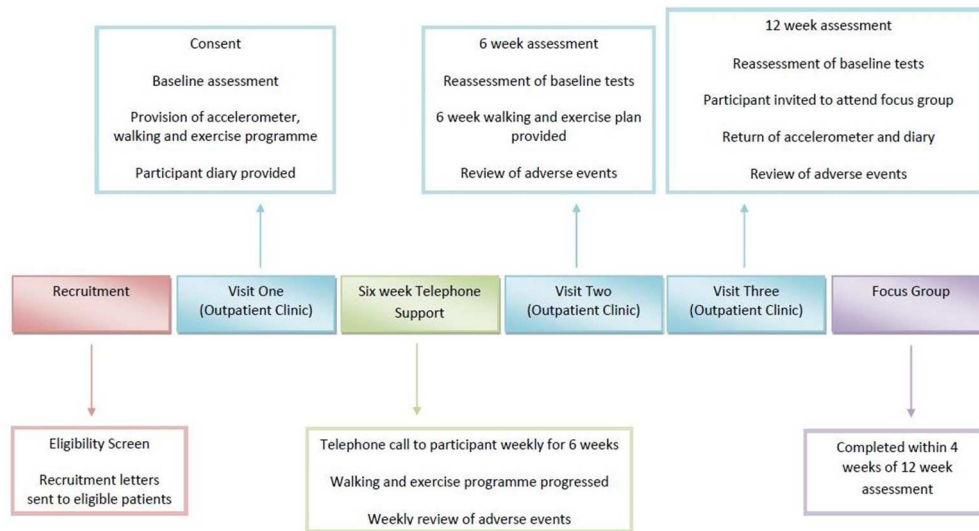

Figure 1 - Study Design Overview

For peer review only

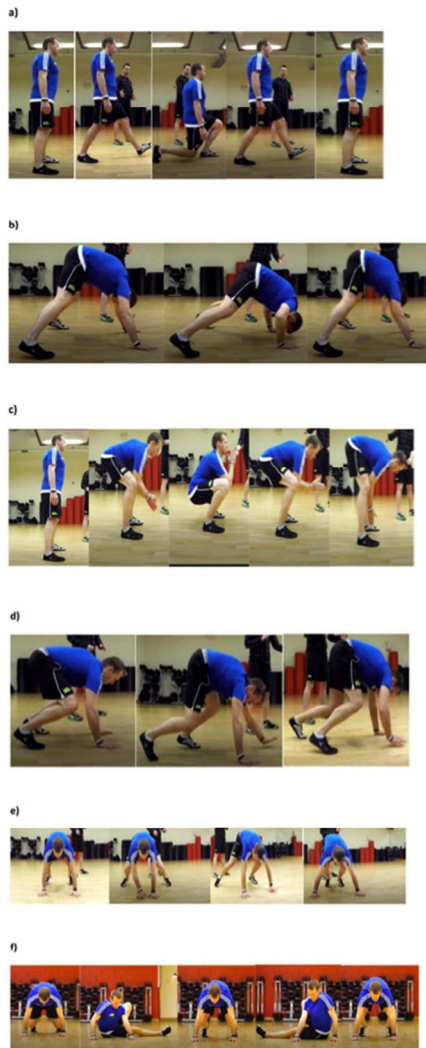

Figure 2 – Functional resistance exercises; a) Lunge, b) Rock Press, c) Frog Squat, d) Bear Crawl, e) Side Bear Crawl, f) Kick Sit

Figure 2 - Functional resistance exercises; a) Lunge, b) Rock Press, c) Frog Squat, d) Bear Crawl, e) Side Bear Crawl, f) Kick Sit

190x275mm (96 x 96 DPI)



**Appendix 1****Telephone Questionnaire**

1  
2  
3  
4  
5  
6  
7  
8  
9  
10  
11  
12  
13  
14  
15  
16  
17  
18  
19  
20  
21  
22  
23  
24  
25  
26  
27  
28  
29  
30  
31  
32  
33  
34  
35  
36  
37  
38  
39  
40  
41  
42  
43  
44  
45  
46  
47  
48  
49  
50  
51  
52  
53  
54  
55  
56  
57  
58  
59  
60

1. How many days per week did you achieve your daily step target?

0 1-2 3-4 5-7

If 5-7 please proceed to question 3

2. What prevented you from achieving your daily step target more frequently?

3. How many times did you complete the functional resistance exercise session this week?

None 1 2 3 >3

If >1 please go to question 5

4. What prevented you from completing the functional resistance exercise sessions?

5. Did you experience any of the following symptoms during or after your exercise?

- a. Muscular pain
- b. Wheeziness
- c. Shortness of breath
- d. Light headedness
- e. Dizziness
- f. Headache
- g. Chest pain/discomfort



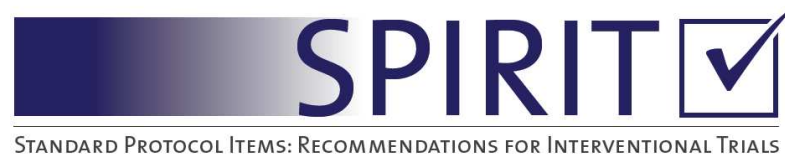

SPIRIT 2013 Checklist: Recommended items to address in a clinical trial protocol and related documents\*

| Section/item                      | Item No | Description                                                                                                                                                                                                                                                                              | Addressed on page number       |
|-----------------------------------|---------|------------------------------------------------------------------------------------------------------------------------------------------------------------------------------------------------------------------------------------------------------------------------------------------|--------------------------------|
| <b>Administrative information</b> |         |                                                                                                                                                                                                                                                                                          |                                |
| Title                             | 1       | Descriptive title identifying the study design, population, interventions, and, if applicable, trial acronym                                                                                                                                                                             | 1                              |
| Trial registration                | 2a      | Trial identifier and registry name. If not yet registered, name of intended registry                                                                                                                                                                                                     | 2                              |
|                                   | 2b      | All items from the World Health Organization Trial Registration Data Set                                                                                                                                                                                                                 | N/A                            |
| Protocol version                  | 3       | Date and version identifier                                                                                                                                                                                                                                                              | Version: 2.0<br>Date: 06.10.17 |
| Funding                           | 4       | Sources and types of financial, material, and other support                                                                                                                                                                                                                              | 14                             |
| Roles and responsibilities        | 5a      | Names, affiliations, and roles of protocol contributors                                                                                                                                                                                                                                  | 1                              |
|                                   | 5b      | Name and contact information for the trial sponsor                                                                                                                                                                                                                                       | 14                             |
|                                   | 5c      | Role of study sponsor and funders, if any, in study design; collection, management, analysis, and interpretation of data; writing of the report; and the decision to submit the report for publication, including whether they will have ultimate authority over any of these activities | 14                             |
|                                   | 5d      | Composition, roles, and responsibilities of the coordinating centre, steering committee, endpoint adjudication committee, data management team, and other individuals or groups overseeing the trial, if applicable (see Item 21a for data monitoring committee)                         | N/A                            |

|    |                                                           |     |                                                                                                               |              |
|----|-----------------------------------------------------------|-----|---------------------------------------------------------------------------------------------------------------|--------------|
| 1  |                                                           |     |                                                                                                               |              |
| 2  |                                                           |     |                                                                                                               |              |
| 3  | <b>Introduction</b>                                       |     |                                                                                                               |              |
| 4  |                                                           |     |                                                                                                               |              |
| 5  | Background and                                            | 6a  | Description of research question and justification for undertaking the trial, including summary of relevant   | 3-4          |
| 6  | rationale                                                 |     | studies (published and unpublished) examining benefits and harms for each intervention                        |              |
| 7  |                                                           |     |                                                                                                               |              |
| 8  |                                                           | 6b  | Explanation for choice of comparators                                                                         | N/A          |
| 9  |                                                           |     |                                                                                                               |              |
| 10 | Objectives                                                | 7   | Specific objectives or hypotheses                                                                             | 4            |
| 11 |                                                           |     |                                                                                                               |              |
| 12 | Trial design                                              | 8   | Description of trial design including type of trial (eg, parallel group, crossover, factorial, single group), |              |
| 13 |                                                           |     | allocation ratio, and framework (eg, superiority, equivalence, noninferiority, exploratory)                   | 5            |
| 14 |                                                           |     |                                                                                                               |              |
| 15 |                                                           |     |                                                                                                               |              |
| 16 | <b>Methods: Participants, interventions, and outcomes</b> |     |                                                                                                               |              |
| 17 |                                                           |     |                                                                                                               |              |
| 18 | Study setting                                             | 9   | Description of study settings (eg, community clinic, academic hospital) and list of countries where data will | 5            |
| 19 |                                                           |     | be collected. Reference to where list of study sites can be obtained                                          |              |
| 20 |                                                           |     |                                                                                                               |              |
| 21 | Eligibility criteria                                      | 10  | Inclusion and exclusion criteria for participants. If applicable, eligibility criteria for study centres and  | 6            |
| 22 |                                                           |     | individuals who will perform the interventions (eg, surgeons, psychotherapists)                               |              |
| 23 |                                                           |     |                                                                                                               |              |
| 24 | Interventions                                             | 11a | Interventions for each group with sufficient detail to allow replication, including how and when they will be | 7-9          |
| 25 |                                                           |     | administered                                                                                                  |              |
| 26 |                                                           |     |                                                                                                               |              |
| 27 |                                                           | 11b | Criteria for discontinuing or modifying allocated interventions for a given trial participant (eg, drug dose  | 7-10         |
| 28 |                                                           |     | change in response to harms, participant request, or improving/worsening disease)                             |              |
| 29 |                                                           |     |                                                                                                               |              |
| 30 |                                                           | 11c | Strategies to improve adherence to intervention protocols, and any procedures for monitoring adherence        | 7-10         |
| 31 |                                                           |     | (eg, drug tablet return, laboratory tests)                                                                    |              |
| 32 |                                                           |     |                                                                                                               |              |
| 33 |                                                           | 11d | Relevant concomitant care and interventions that are permitted or prohibited during the trial                 | N/A          |
| 34 |                                                           |     |                                                                                                               |              |
| 35 | Outcomes                                                  | 12  | Primary, secondary, and other outcomes, including the specific measurement variable (eg, systolic blood       | 10-13        |
| 36 |                                                           |     | pressure), analysis metric (eg, change from baseline, final value, time to event), method of aggregation (eg, |              |
| 37 |                                                           |     | median, proportion), and time point for each outcome. Explanation of the clinical relevance of chosen         |              |
| 38 |                                                           |     | efficacy and harm outcomes is strongly recommended                                                            |              |
| 39 |                                                           |     |                                                                                                               |              |
| 40 |                                                           |     |                                                                                                               |              |
| 41 | Participant timeline                                      | 13  | Time schedule of enrolment, interventions (including any run-ins and washouts), assessments, and visits for   | See Figure 1 |
| 42 |                                                           |     | participants. A schematic diagram is highly recommended (see Figure)                                          |              |
| 43 |                                                           |     |                                                                                                               |              |
| 44 |                                                           |     |                                                                                                               |              |
| 45 |                                                           |     |                                                                                                               |              |
| 46 |                                                           |     |                                                                                                               |              |
| 47 |                                                           |     |                                                                                                               |              |
| 48 |                                                           |     |                                                                                                               |              |
| 49 |                                                           |     |                                                                                                               |              |

|    |                                                                     |     |                                                                                                                                                                                                                                                                                                                                                          |     |
|----|---------------------------------------------------------------------|-----|----------------------------------------------------------------------------------------------------------------------------------------------------------------------------------------------------------------------------------------------------------------------------------------------------------------------------------------------------------|-----|
| 1  |                                                                     |     |                                                                                                                                                                                                                                                                                                                                                          |     |
| 2  |                                                                     |     |                                                                                                                                                                                                                                                                                                                                                          |     |
| 3  | Sample size                                                         | 14  | Estimated number of participants needed to achieve study objectives and how it was determined, including clinical and statistical assumptions supporting any sample size calculations                                                                                                                                                                    | 6   |
| 4  |                                                                     |     |                                                                                                                                                                                                                                                                                                                                                          |     |
| 5  |                                                                     |     |                                                                                                                                                                                                                                                                                                                                                          |     |
| 6  | Recruitment                                                         | 15  | Strategies for achieving adequate participant enrolment to reach target sample size                                                                                                                                                                                                                                                                      | 6-7 |
| 7  |                                                                     |     |                                                                                                                                                                                                                                                                                                                                                          |     |
| 8  | <b>Methods: Assignment of interventions (for controlled trials)</b> |     |                                                                                                                                                                                                                                                                                                                                                          |     |
| 9  |                                                                     |     |                                                                                                                                                                                                                                                                                                                                                          |     |
| 10 | Allocation:                                                         |     |                                                                                                                                                                                                                                                                                                                                                          |     |
| 11 |                                                                     |     |                                                                                                                                                                                                                                                                                                                                                          |     |
| 12 | Sequence generation                                                 | 16a | Method of generating the allocation sequence (eg, computer-generated random numbers), and list of any factors for stratification. To reduce predictability of a random sequence, details of any planned restriction (eg, blocking) should be provided in a separate document that is unavailable to those who enrol participants or assign interventions | 6   |
| 13 |                                                                     |     |                                                                                                                                                                                                                                                                                                                                                          |     |
| 14 |                                                                     |     |                                                                                                                                                                                                                                                                                                                                                          |     |
| 15 |                                                                     |     |                                                                                                                                                                                                                                                                                                                                                          |     |
| 16 |                                                                     |     |                                                                                                                                                                                                                                                                                                                                                          |     |
| 17 |                                                                     |     |                                                                                                                                                                                                                                                                                                                                                          |     |
| 18 | Allocation concealment mechanism                                    | 16b | Mechanism of implementing the allocation sequence (eg, central telephone; sequentially numbered, opaque, sealed envelopes), describing any steps to conceal the sequence until interventions are assigned                                                                                                                                                | 6   |
| 19 |                                                                     |     |                                                                                                                                                                                                                                                                                                                                                          |     |
| 20 |                                                                     |     |                                                                                                                                                                                                                                                                                                                                                          |     |
| 21 |                                                                     |     |                                                                                                                                                                                                                                                                                                                                                          |     |
| 22 | Implementation                                                      | 16c | Who will generate the allocation sequence, who will enrol participants, and who will assign participants to interventions                                                                                                                                                                                                                                | 6   |
| 23 |                                                                     |     |                                                                                                                                                                                                                                                                                                                                                          |     |
| 24 |                                                                     |     |                                                                                                                                                                                                                                                                                                                                                          |     |
| 25 | Blinding (masking)                                                  | 17a | Who will be blinded after assignment to interventions (eg, trial participants, care providers, outcome assessors, data analysts), and how                                                                                                                                                                                                                | N/A |
| 26 |                                                                     |     |                                                                                                                                                                                                                                                                                                                                                          |     |
| 27 |                                                                     |     |                                                                                                                                                                                                                                                                                                                                                          |     |
| 28 |                                                                     | 17b | If blinded, circumstances under which unblinding is permissible, and procedure for revealing a participant's allocated intervention during the trial                                                                                                                                                                                                     | N/A |
| 29 |                                                                     |     |                                                                                                                                                                                                                                                                                                                                                          |     |
| 30 |                                                                     |     |                                                                                                                                                                                                                                                                                                                                                          |     |
| 31 |                                                                     |     |                                                                                                                                                                                                                                                                                                                                                          |     |

### Methods: Data collection, management, and analysis

|    |                         |     |                                                                                                                                                                                                                                                                                                                                                                                                              |       |
|----|-------------------------|-----|--------------------------------------------------------------------------------------------------------------------------------------------------------------------------------------------------------------------------------------------------------------------------------------------------------------------------------------------------------------------------------------------------------------|-------|
| 32 |                         |     |                                                                                                                                                                                                                                                                                                                                                                                                              |       |
| 33 |                         |     |                                                                                                                                                                                                                                                                                                                                                                                                              |       |
| 34 | Data collection methods | 18a | Plans for assessment and collection of outcome, baseline, and other trial data, including any related processes to promote data quality (eg, duplicate measurements, training of assessors) and a description of study instruments (eg, questionnaires, laboratory tests) along with their reliability and validity, if known. Reference to where data collection forms can be found, if not in the protocol | 10-12 |
| 35 |                         |     |                                                                                                                                                                                                                                                                                                                                                                                                              |       |
| 36 |                         |     |                                                                                                                                                                                                                                                                                                                                                                                                              |       |
| 37 |                         |     |                                                                                                                                                                                                                                                                                                                                                                                                              |       |
| 38 |                         |     |                                                                                                                                                                                                                                                                                                                                                                                                              |       |
| 39 |                         | 18b | Plans to promote participant retention and complete follow-up, including list of any outcome data to be collected for participants who discontinue or deviate from intervention protocols                                                                                                                                                                                                                    | 7     |
| 40 |                         |     |                                                                                                                                                                                                                                                                                                                                                                                                              |       |
| 41 |                         |     |                                                                                                                                                                                                                                                                                                                                                                                                              |       |
| 42 |                         |     |                                                                                                                                                                                                                                                                                                                                                                                                              |       |
| 43 |                         |     |                                                                                                                                                                                                                                                                                                                                                                                                              |       |
| 44 |                         |     |                                                                                                                                                                                                                                                                                                                                                                                                              |       |
| 45 |                         |     |                                                                                                                                                                                                                                                                                                                                                                                                              |       |

|    |                                 |     |                                                                                                                                                                                                                                                                                                                                       |         |
|----|---------------------------------|-----|---------------------------------------------------------------------------------------------------------------------------------------------------------------------------------------------------------------------------------------------------------------------------------------------------------------------------------------|---------|
| 1  |                                 |     |                                                                                                                                                                                                                                                                                                                                       |         |
| 2  |                                 |     |                                                                                                                                                                                                                                                                                                                                       |         |
| 3  | Data management                 | 19  | Plans for data entry, coding, security, and storage, including any related processes to promote data quality (eg, double data entry; range checks for data values). Reference to where details of data management procedures can be found, if not in the protocol                                                                     | 14      |
| 4  |                                 |     |                                                                                                                                                                                                                                                                                                                                       |         |
| 5  |                                 |     |                                                                                                                                                                                                                                                                                                                                       |         |
| 6  |                                 |     |                                                                                                                                                                                                                                                                                                                                       |         |
| 7  | Statistical methods             | 20a | Statistical methods for analysing primary and secondary outcomes. Reference to where other details of the statistical analysis plan can be found, if not in the protocol                                                                                                                                                              | 13      |
| 8  |                                 |     |                                                                                                                                                                                                                                                                                                                                       |         |
| 9  |                                 |     |                                                                                                                                                                                                                                                                                                                                       |         |
| 10 |                                 | 20b | Methods for any additional analyses (eg, subgroup and adjusted analyses)                                                                                                                                                                                                                                                              | N/A     |
| 11 |                                 |     |                                                                                                                                                                                                                                                                                                                                       |         |
| 12 |                                 | 20c | Definition of analysis population relating to protocol non-adherence (eg, as randomised analysis), and any statistical methods to handle missing data (eg, multiple imputation)                                                                                                                                                       | N/A     |
| 13 |                                 |     |                                                                                                                                                                                                                                                                                                                                       |         |
| 14 |                                 |     |                                                                                                                                                                                                                                                                                                                                       |         |
| 15 |                                 |     |                                                                                                                                                                                                                                                                                                                                       |         |
| 16 | <b>Methods: Monitoring</b>      |     |                                                                                                                                                                                                                                                                                                                                       |         |
| 17 |                                 |     |                                                                                                                                                                                                                                                                                                                                       |         |
| 18 | Data monitoring                 | 21a | Composition of data monitoring committee (DMC); summary of its role and reporting structure; statement of whether it is independent from the sponsor and competing interests; and reference to where further details about its charter can be found, if not in the protocol. Alternatively, an explanation of why a DMC is not needed | N/A     |
| 19 |                                 |     |                                                                                                                                                                                                                                                                                                                                       |         |
| 20 |                                 |     |                                                                                                                                                                                                                                                                                                                                       |         |
| 21 |                                 |     |                                                                                                                                                                                                                                                                                                                                       |         |
| 22 |                                 |     |                                                                                                                                                                                                                                                                                                                                       |         |
| 23 |                                 | 21b | Description of any interim analyses and stopping guidelines, including who will have access to these interim results and make the final decision to terminate the trial                                                                                                                                                               | N/A     |
| 24 |                                 |     |                                                                                                                                                                                                                                                                                                                                       |         |
| 25 |                                 |     |                                                                                                                                                                                                                                                                                                                                       |         |
| 26 | Harms                           | 22  | Plans for collecting, assessing, reporting, and managing solicited and spontaneously reported adverse events and other unintended effects of trial interventions or trial conduct                                                                                                                                                     | 12-13   |
| 27 |                                 |     |                                                                                                                                                                                                                                                                                                                                       |         |
| 28 |                                 |     |                                                                                                                                                                                                                                                                                                                                       |         |
| 29 | Auditing                        | 23  | Frequency and procedures for auditing trial conduct, if any, and whether the process will be independent from investigators and the sponsor                                                                                                                                                                                           | N/A     |
| 30 |                                 |     |                                                                                                                                                                                                                                                                                                                                       |         |
| 31 |                                 |     |                                                                                                                                                                                                                                                                                                                                       |         |
| 32 |                                 |     |                                                                                                                                                                                                                                                                                                                                       |         |
| 33 | <b>Ethics and dissemination</b> |     |                                                                                                                                                                                                                                                                                                                                       |         |
| 34 |                                 |     |                                                                                                                                                                                                                                                                                                                                       |         |
| 35 | Research ethics approval        | 24  | Plans for seeking research ethics committee/institutional review board (REC/IRB) approval                                                                                                                                                                                                                                             | 2 and 6 |
| 36 |                                 |     |                                                                                                                                                                                                                                                                                                                                       |         |
| 37 |                                 |     |                                                                                                                                                                                                                                                                                                                                       |         |
| 38 | Protocol amendments             | 25  | Plans for communicating important protocol modifications (eg, changes to eligibility criteria, outcomes, analyses) to relevant parties (eg, investigators, REC/IRBs, trial participants, trial registries, journals, regulators)                                                                                                      | 6       |
| 39 |                                 |     |                                                                                                                                                                                                                                                                                                                                       |         |
| 40 |                                 |     |                                                                                                                                                                                                                                                                                                                                       |         |
| 41 |                                 |     |                                                                                                                                                                                                                                                                                                                                       |         |
| 42 |                                 |     |                                                                                                                                                                                                                                                                                                                                       |         |
| 43 |                                 |     |                                                                                                                                                                                                                                                                                                                                       |         |
| 44 |                                 |     |                                                                                                                                                                                                                                                                                                                                       |         |
| 45 |                                 |     |                                                                                                                                                                                                                                                                                                                                       |         |
| 46 |                                 |     |                                                                                                                                                                                                                                                                                                                                       |         |
| 47 |                                 |     |                                                                                                                                                                                                                                                                                                                                       |         |
| 48 |                                 |     |                                                                                                                                                                                                                                                                                                                                       |         |
| 49 |                                 |     |                                                                                                                                                                                                                                                                                                                                       |         |

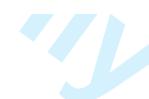

|    |                               |     |                                                                                                                                                                                                                                                                                     |         |
|----|-------------------------------|-----|-------------------------------------------------------------------------------------------------------------------------------------------------------------------------------------------------------------------------------------------------------------------------------------|---------|
| 1  |                               |     |                                                                                                                                                                                                                                                                                     |         |
| 2  |                               |     |                                                                                                                                                                                                                                                                                     |         |
| 3  | Consent or assent             | 26a | Who will obtain informed consent or assent from potential trial participants or authorised surrogates, and how (see Item 32)                                                                                                                                                        | 7       |
| 4  |                               |     |                                                                                                                                                                                                                                                                                     |         |
| 5  |                               |     |                                                                                                                                                                                                                                                                                     |         |
| 6  |                               | 26b | Additional consent provisions for collection and use of participant data and biological specimens in ancillary studies, if applicable                                                                                                                                               | N/A     |
| 7  |                               |     |                                                                                                                                                                                                                                                                                     |         |
| 8  |                               |     |                                                                                                                                                                                                                                                                                     |         |
| 9  | Confidentiality               | 27  | How personal information about potential and enrolled participants will be collected, shared, and maintained in order to protect confidentiality before, during, and after the trial                                                                                                | 13      |
| 10 |                               |     |                                                                                                                                                                                                                                                                                     |         |
| 11 |                               |     |                                                                                                                                                                                                                                                                                     |         |
| 12 | Declaration of interests      | 28  | Financial and other competing interests for principal investigators for the overall trial and each study site                                                                                                                                                                       | 3       |
| 13 |                               |     |                                                                                                                                                                                                                                                                                     |         |
| 14 |                               |     |                                                                                                                                                                                                                                                                                     |         |
| 15 | Access to data                | 29  | Statement of who will have access to the final trial dataset, and disclosure of contractual agreements that limit such access for investigators                                                                                                                                     | 13      |
| 16 |                               |     |                                                                                                                                                                                                                                                                                     |         |
| 17 |                               |     |                                                                                                                                                                                                                                                                                     |         |
| 18 | Ancillary and post-trial care | 30  | Provisions, if any, for ancillary and post-trial care, and for compensation to those who suffer harm from trial participation                                                                                                                                                       | N/A     |
| 19 |                               |     |                                                                                                                                                                                                                                                                                     |         |
| 20 |                               |     |                                                                                                                                                                                                                                                                                     |         |
| 21 | Dissemination policy          | 31a | Plans for investigators and sponsor to communicate trial results to participants, healthcare professionals, the public, and other relevant groups (eg, via publication, reporting in results databases, or other data sharing arrangements), including any publication restrictions | 2       |
| 22 |                               |     |                                                                                                                                                                                                                                                                                     |         |
| 23 |                               |     |                                                                                                                                                                                                                                                                                     |         |
| 24 |                               |     |                                                                                                                                                                                                                                                                                     |         |
| 25 |                               |     |                                                                                                                                                                                                                                                                                     |         |
| 26 |                               | 31b | Authorship eligibility guidelines and any intended use of professional writers                                                                                                                                                                                                      | 1       |
| 27 |                               |     |                                                                                                                                                                                                                                                                                     |         |
| 28 |                               | 31c | Plans, if any, for granting public access to the full protocol, participant-level dataset, and statistical code                                                                                                                                                                     | 2 and 8 |
| 29 |                               |     |                                                                                                                                                                                                                                                                                     |         |
| 30 | <b>Appendices</b>             |     |                                                                                                                                                                                                                                                                                     |         |
| 31 |                               |     |                                                                                                                                                                                                                                                                                     |         |
| 32 | Informed consent materials    | 32  | Model consent form and other related documentation given to participants and authorised surrogates                                                                                                                                                                                  | 6       |
| 33 |                               |     |                                                                                                                                                                                                                                                                                     |         |
| 34 |                               |     |                                                                                                                                                                                                                                                                                     |         |
| 35 | Biological specimens          | 33  | Plans for collection, laboratory evaluation, and storage of biological specimens for genetic or molecular analysis in the current trial and for future use in ancillary studies, if applicable                                                                                      | NA      |
| 36 |                               |     |                                                                                                                                                                                                                                                                                     |         |
| 37 |                               |     |                                                                                                                                                                                                                                                                                     |         |

\*It is strongly recommended that this checklist be read in conjunction with the SPIRIT 2013 Explanation & Elaboration for important clarification on the items. Amendments to the protocol should be tracked and dated. The SPIRIT checklist is copyrighted by the SPIRIT Group under the Creative Commons "[Attribution-NonCommercial-NoDerivs 3.0 Unported](https://creativecommons.org/licenses/by-nc-nd/3.0/)" license.

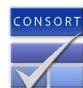

## CONSORT 2010 checklist of information to include when reporting a randomised trial\*

| Section/Topic                    | Item No | Checklist item                                                                                                                                                                              | Reported on page No |
|----------------------------------|---------|---------------------------------------------------------------------------------------------------------------------------------------------------------------------------------------------|---------------------|
| <b>Title and abstract</b>        |         |                                                                                                                                                                                             |                     |
|                                  | 1a      | Identification as a randomised trial in the title                                                                                                                                           | N/A                 |
|                                  | 1b      | Structured summary of trial design, methods, results, and conclusions (for specific guidance see CONSORT for abstracts)                                                                     | 2 and 3             |
| <b>Introduction</b>              |         |                                                                                                                                                                                             |                     |
| Background and objectives        | 2a      | Scientific background and explanation of rationale                                                                                                                                          | 3 and 4             |
|                                  | 2b      | Specific objectives or hypotheses                                                                                                                                                           | 4                   |
| <b>Methods</b>                   |         |                                                                                                                                                                                             |                     |
| Trial design                     | 3a      | Description of trial design (such as parallel, factorial) including allocation ratio                                                                                                        | 5                   |
|                                  | 3b      | Important changes to methods after trial commencement (such as eligibility criteria), with reasons                                                                                          | 6-7                 |
| Participants                     | 4a      | Eligibility criteria for participants                                                                                                                                                       | 6                   |
|                                  | 4b      | Settings and locations where the data were collected                                                                                                                                        | 5-7                 |
| Interventions                    | 5       | The interventions for each group with sufficient details to allow replication, including how and when they were actually administered                                                       | 6 - 9               |
| Outcomes                         | 6a      | Completely defined pre-specified primary and secondary outcome measures, including how and when they were assessed                                                                          | 10 - 12             |
|                                  | 6b      | Any changes to trial outcomes after the trial commenced, with reasons                                                                                                                       | N/A                 |
| Sample size                      | 7a      | How sample size was determined                                                                                                                                                              | N/A                 |
|                                  | 7b      | When applicable, explanation of any interim analyses and stopping guidelines                                                                                                                | N/A                 |
| <b>Randomisation:</b>            |         |                                                                                                                                                                                             |                     |
| Sequence generation              | 8a      | Method used to generate the random allocation sequence                                                                                                                                      | 6                   |
|                                  | 8b      | Type of randomisation; details of any restriction (such as blocking and block size)                                                                                                         | 6                   |
| Allocation concealment mechanism | 9       | Mechanism used to implement the random allocation sequence (such as sequentially numbered containers), describing any steps taken to conceal the sequence until interventions were assigned | 6                   |
| Implementation                   | 10      | Who generated the random allocation sequence, who enrolled participants, and who assigned participants to interventions                                                                     | 6 - 7               |
| Blinding                         | 11a     | If done, who was blinded after assignment to interventions (for example, participants, care providers, those                                                                                | N/A                 |

|                                                      |     |                                                                                                                                                   |     |
|------------------------------------------------------|-----|---------------------------------------------------------------------------------------------------------------------------------------------------|-----|
|                                                      |     | assessing outcomes) and how                                                                                                                       |     |
|                                                      | 11b | If relevant, description of the similarity of interventions                                                                                       | N/A |
| Statistical methods                                  | 12a | Statistical methods used to compare groups for primary and secondary outcomes                                                                     | 13  |
|                                                      | 12b | Methods for additional analyses, such as subgroup analyses and adjusted analyses                                                                  | N/A |
| <b>Results</b>                                       |     |                                                                                                                                                   |     |
| Participant flow (a diagram is strongly recommended) | 13a | For each group, the numbers of participants who were randomly assigned, received intended treatment, and were analysed for the primary outcome    | N/A |
|                                                      | 13b | For each group, losses and exclusions after randomisation, together with reasons                                                                  | N/A |
| Recruitment                                          | 14a | Dates defining the periods of recruitment and follow-up                                                                                           | 15  |
|                                                      | 14b | Why the trial ended or was stopped                                                                                                                | N/A |
| Baseline data                                        | 15  | A table showing baseline demographic and clinical characteristics for each group                                                                  | N/A |
| Numbers analysed                                     | 16  | For each group, number of participants (denominator) included in each analysis and whether the analysis was by original assigned groups           | N/A |
| Outcomes and estimation                              | 17a | For each primary and secondary outcome, results for each group, and the estimated effect size and its precision (such as 95% confidence interval) | N/A |
|                                                      | 17b | For binary outcomes, presentation of both absolute and relative effect sizes is recommended                                                       | N/A |
| Ancillary analyses                                   | 18  | Results of any other analyses performed, including subgroup analyses and adjusted analyses, distinguishing pre-specified from exploratory         | N/A |
| Harms                                                | 19  | All important harms or unintended effects in each group (for specific guidance see CONSORT for harms)                                             | N/A |
| <b>Discussion</b>                                    |     |                                                                                                                                                   |     |
| Limitations                                          | 20  | Trial limitations, addressing sources of potential bias, imprecision, and, if relevant, multiplicity of analyses                                  | N/A |
| Generalisability                                     | 21  | Generalisability (external validity, applicability) of the trial findings                                                                         | N/A |
| Interpretation                                       | 22  | Interpretation consistent with results, balancing benefits and harms, and considering other relevant evidence                                     | N/A |
| <b>Other information</b>                             |     |                                                                                                                                                   |     |
| Registration                                         | 23  | Registration number and name of trial registry                                                                                                    | 2   |
| Protocol                                             | 24  | Where the full trial protocol can be accessed, if available                                                                                       | N/A |
| Funding                                              | 25  | Sources of funding and other support (such as supply of drugs), role of funders                                                                   | 15  |

\*We strongly recommend reading this statement in conjunction with the CONSORT 2010 Explanation and Elaboration for important clarifications on all the items. If relevant, we also recommend reading CONSORT extensions for cluster randomised trials, non-inferiority and equivalence trials, non-pharmacological treatments, herbal interventions, and pragmatic trials. Additional extensions are forthcoming: for those and for up to date references relevant to this checklist, see [www.consort-statement.org](http://www.consort-statement.org).
