# Supplementary material for: Home-based exercise therapy in patients awaiting liver transplantation: protocol for an observational feasibility trial
Source: PubMed Central journal article supplement — BMJ Open. 2018 Jan 21;8(1):e019298. doi: 10.1136/bmjopen-2017-019298 (PMC5781094; doi:10.1136/bmjopen-2017-019298), 2018-01-21
Supplement: bmjopen-2017-019298supp001.pdf [file bmjopen-2017-019298supp001.pdf]

## **Appendix 1**

### **Telephone Questionnaire**

1. How many days per week did you achieve your daily step target?

0   1-2   3-4   5-7

**If 5-7 please proceed to question 3**

2. What prevented you from achieving your daily step target more frequently?

3. How many times did you complete the functional resistance exercise session this week?

None   1   2   3   >3

**If >1 please go to question 5**

4. What prevented you from completing the functional resistance exercise sessions?

5. Did you experience any of the following symptoms during or after your exercise?

- a. **Muscular pain**
- b. **Wheeziness**
- c. **Shortness of breath**
- d. **Light headedness**
- e. **Dizziness**
- f. **Headache**
- g. **Chest pain/discomfort**
